# Supplementary material for: Effect of a Machine Learning Recommender System and Viral Peer Marketing Intervention on Smoking Cessation: A Randomized Clinical Trial
Source: PubMed Central journal article supplement (PMC9856644; doi:10.1001/jamanetworkopen.2022.50665), 2023-01-12
Supplement: jamanetwopen-e2250665-s001.pdf [file jamanetwopen-e2250665-s001.pdf]

# INVESTIGATOR STUDY PLAN - REQUIRED

- 1  
2 **1. TITLE**  
3 Smoker-to-Smoker (S2S) Peer Marketing and Messaging to Disseminate Tobacco Interventions  
4  
5 **2. EXTERNAL IRB REVIEW HISTORY\***  
6 NA  
7  
8 **3. PRIOR APPROVALS:**  
9 NA  
10  
11 **4. OBJECTIVES\***  
12 **AIM 1:** Using a 2x2 factorial design with 1700 smokers, test the impact of the S2S enhanced functions  
13 to increase dissemination (recruitment and repeated use) and effectiveness of Decide2Quit.  
14 **Standard functions:**  
15 • **Online recruitment** using search engine and social media advertisements to recruit smokers to  
16 Decide2Quit.  
17 • **Standard computer tailored health communication (CTHC)** using expert-written rules to tailor  
18 messages to smokers based on readiness to quit.  
19 **S2S functions:**  
20 • **Peer recruitment** tools to facilitate smokers' recruiting their peers to increase Decide2Quit access.  
21 • **Recommender computer tailored health communication (recommender CTHC):** a Complex  
22 machine learning algorithm (recommender systems) that uses smokers' feedback (explicit and  
23 implicit) in the current and prior studies to adapt its selection of messages to smokers.  
24 **Study Groups: A:** Fully enhanced (both peer recruitment and recommender CTHC); **B:** Recommender  
25 CTHC only; **C:** Peer recruitment only; **D:** Standard (online recruitment and standard CTHC).  
26 **AIM 2:** Follow participants in the 2x2 factorial trial for six months testing S2S. We hypothesize that:  
27 **H1: Recruitment**  
28 **H1A:** Peer recruitment will recruit a greater proportion of African American smokers, compared to  
29 standard online recruitment.  
30 **H1B:** Peer recruitment will reduce recruitment time (time to recruit each participant), compared to  
31 standard online recruitment.  
32 **H2:\* Repeated use of Decide2Quit functions.**  
33 **H2A:** Repeated use among those exposed to the fully enhanced group (peer recruitment and  
34 recommender CTHC) will be greater than repeated use among those exposed to a) peer recruitment  
35 only b) recommender CTHC only and c) standard group (online recruitment and standard CTHC).  
36 **H2B:** Repeated use among those exposed to peer recruitment will be greater than repeated use  
37 among those exposed to the standard group.  
38 **H2C:** Repeated use among those exposed to recommender CTHC will be greater than repeated use  
39 among those exposed to the standard group.  
40 **H3: \* Quit** — six month, 7-day point prevalence— and **risk reduction** in number of cigarettes smoked  
41 (patient panel recommended outcome).  
42 **H3A:** Quit rates among those exposed to the fully enhanced group (peer recruitment and  
43 recommender CTHC) will be greater than quit rates among those exposed to a) peer recruitment only  
44 b) recommender CTHC only and c) standard group (online recruitment and standard CTHC).  
45 **H3B:** Quit rates among those exposed to peer recruitment will be greater than quit rates among  
46 those exposed to the standard group.  
47 **H3C:** Quit rates among those exposed to recommender CTHC will be greater than quit rates among  
48 those exposed to the standard group.  
49 H3A, H3B, and H3C will be tested for the risk reduction outcome also.

## INVESTIGATOR STUDY PLAN - REQUIRED

50 *\*For both H2 and H3, we will compare all smokers across the groups, and African American smokers*  
51 *across groups, and African American and White smokers for assessing heterogeneity of treatment*  
52 *effects.*

53

### 54 **5. BACKGROUND\***

#### 55 **A.1. Overview**

56 **“Smoker-to-Smoker (S2S) Peer Marketing and Messaging to Disseminate Tobacco Interventions”** will  
57 test two smoker-driven, social marketing innovations to recruit and engage smokers in Decide2Quit.org  
58 (Decide2Quit), an evidence-based, effective “Digital Intervention for Smoking Cessation” (DISC).[1, 2]  
59 These S2S innovations, designed to utilize the power of peers and social networks for dissemination are:

- 60 • **Peer recruitment:** Tools to facilitate smokers’ recruiting their peers to increase Decide2Quit  
61 access (NCI R21CA158968).
- 62 • **Recommender computer tailored health communication (recommender CTHC):** a Complex  
63 machine learning algorithm (recommender systems) that uses smokers’ feedback (explicit and  
64 implicit) in the current and prior studies to adapt its selection of messages to smokers (PCORI  
65 IP2P1000582).

66 Using a 2x2 factorial design, we will compare individually and collectively the enhancements  
67 (recruitment, use, and effectiveness) offered by the S2S functions over the standard version of  
68 Decide2Quit (online recruitment and standard CTHC), an active comparison group that was  
69 demonstrated to be effective in our previous trial.[3] In our prior study, we found peer recruitment was  
70 particularly effective for engaging African American smokers. We will also test the comparative  
71 effectiveness of peer recruitment to target African American smokers, a disproportionately affected  
72 group due to tobacco use, over standard online recruitment in this dissemination study.[4-10]

#### 73 **A.2. Condition impact (smoking) on health of individuals and populations**

74 Smoking is the number one preventable cause of death in the United States (USA).[11-15]  
75 Yearly, over six million deaths in the world are attributable to smoking, including 480,000 in the  
76 USA.[16] The CDC estimates that for every person who dies because of smoking, at least 30 people live  
77 with a serious smoking-related illness, including cancer, heart disease, stroke, lung diseases, diabetes,  
78 and chronic obstructive pulmonary disease (COPD).[16] One estimate suggested that the proportion of  
79 USA health care expenditure attributable to smoking ranges between 6-18% of the budget across  
80 different states.[17] The cost per life year saved from use of pharmacological treatment interventions  
81 ranged between US\$128 and US\$1,450 and up to US\$4,400 per quality-adjusted life years saved.[17] As  
82 noted in Section B.3., African Americans are disproportionately affected by tobacco and many of their  
83 health issues are directly related to their tobacco use.[4-10] Thus, reducing tobacco use will have  
84 considerable health impact, and play an important role in reducing health disparities.

#### 85 **A.3. Evidence gap**

86 S2S addresses a key question — what are the effective strategies for increasing consumer  
87 demand for and use of proven, individually oriented cessation treatments, including among diverse  
88 populations? — raised in the State-of-the-Science Conference Statement on Tobacco Use.[18] We are  
89 focused on identifying effective strategies to disseminate and improve effectiveness of a DISC —  
90 [www.decide2quit.org](http://www.decide2quit.org) (Decide2Quit). DISCs are health communication programs accessible via Internet  
91 connections and smart phones. DISCs can include a number of functions designed to support a smoker’s  
92 cessation attempt. Decide2Quit includes self-management functions, pushed and tailored motivational  
93 messages (email or text-messages), online community, and peer support. Several studies, including  
94 systematic reviews,[19-21] have shown that DISCs can be effective. A Cochrane review found a  
95 statistically significant effect comparing tailored DISCs to usual care or written self-help (RR 1.48, 95% CI  
96 1.11, 2.78).[21] Although this evidence is mixed, two factors are typically associated with the  
97 effectiveness of DISCs.[13, 19-29] These include the use of CTHC to personalize messaging to smokers,  
98 and the engagement of smokers (recruitment and repeated system use). In our previous randomized  
99 trial [1R01CA129091] testing Decide2Quit (n=900), at 6-months, 30% of smokers who received the CTHC  
100 messages reported quitting at 6 months compared to 20% of smokers who received an interactive DISC  
101 but no messages [odds ratio 1.70 (95% CI 1.03-2.81)].[3] We have also demonstrated that the repeated  
102 use of Decide2Quit functions was significantly associated with six-month, 30-day point prevalence

## INVESTIGATOR STUDY PLAN - REQUIRED

103 cessation. Using a repeated use measure — an ordinal scale of the number of functions used after the  
104 first visit to the website (0: use of no functions, 1: use of 1-2 functions, 2: > 2-4 functions) — we found a  
105 linear association with six-month cessation. For every increase by one in this scale, odds of smoking  
106 cessation increased (OR= 2.10, 95% CI = 1.03, 4.30).[30] In conclusion, DISCs can be an effective resource  
107 for smokers, but the success depends on the implementation of CTHC, and the longitudinal engagement  
108 of smokers.

109 Outside healthcare, companies have innovated to use bottom-up, “user-driven” approaches to  
110 increase their websites’ access and engagement. Peer marketing — engaging one customer to recruit  
111 others — has become the preferred approach to increase access to their websites. To motivate users to  
112 repeatedly use their system, companies like Amazon and Netflix Use recommender systems to deliver  
113 enhanced personalization. However, these tools have not been rigorously tested for disseminating  
114 health interventions in comparative effectiveness studies. In our prior studies [PCORI IP2P1000582, NCI  
115 R21CA158968], we have developed and demonstrated the efficacy of peer recruitment and  
116 recommender CTHC to disseminate Decide2Quit — recruit and motivate smokers to repeatedly use the  
117 system — and improve its effectiveness. Using a 2x2 factorial design, we will rigorously test these tools  
118 in a comparative effectiveness study, compared with the standard Decide2Quit (online recruitment and  
119 standard CTHC). PCORI defines dissemination as the active and targeted approach of spreading  
120 evidence-based interventions to potential adopters and the target audience through determined  
121 channels using planned strategies, and its goals as to increase the reach of information, motivation, and  
122 patients’ ability to use and apply evidence.[31-33] Thus, both recruitment and use measures are needed  
123 to appropriately evaluate our DISC dissemination strategy. If recruitment is unsuccessful, then the  
124 intervention’s reach is low. If recruitment is successful, but the intervention does not motivate repeated  
125 use, then there is low intervention fidelity, reducing the patient’s motivation and ability to apply  
126 evidence. Beyond measuring dissemination, we will evaluate our interventions’ effectiveness by  
127 measuring six-month cessation, and measuring reduction in cigarettes, as advised by our patient panel.

### 128 **B. SIGNIFICANCE**

129 Because prior literature and our own preliminary data suggest multiple barriers in the reach of  
130 smoking cessation interventions, including those online, new approaches to increasing dissemination  
131 are needed.[34] The majority of smokers are not interested in quitting at any given time.[35] Even those  
132 highly motivated to quit often fail in their attempts.[36] Peer recruitment and recommender CTHC are  
133 unique in that they harness the power of smokers to disseminate a cessation intervention (recruit and  
134 motivate to repeatedly use), and encourage cessation. In this section, we describe the potential impact  
135 and reach of DISCs, potential to target those most in need, and the two patient-centric and patient-  
136 driven S2S innovations (peer recruitment and recommender CTHC), including their theoretical  
137 foundations.

#### 138 **B.1. Impact of DISC (Impact = Reach × Effectiveness)**

139 Per the RE-Aim framework,[37] an intervention’s impact is a product of its reach and  
140 effectiveness. Although in-person and telephone counseling are effective, they are costly and underused  
141 (reducing their reach). DISCs can serve as important augmentation for those receiving in-person and  
142 telephone counseling (to use in between sessions and for longitudinal support). For those who do not  
143 have access to these options, DISCs may serve as the only source of tobacco cessation support. As  
144 noted, Decide2Quit achieved a cessation rate of 30% at six months, much higher than the rate (7%) at  
145 which smokers quit without support.[38] Thus, it is important to innovate and increase dissemination  
146 and effectiveness of DISCs.

#### 147 **B.2. DISCs: Internet, Social Media Use, and Digital divide**

148 DISCs are health communication programs readily accessible via the Internet and smart phones.  
149 Thus, it has considerable potential to reach a large and diverse group of smokers. In 2014, an estimated  
150 87% of Americans had Internet access.[39, 40] Digital divide in Internet access has decreased  
151 considerably, especially with increasing smart phone use. In 2015, an estimated 61% of Whites, 70% of  
152 African Americans, and 71% of Hispanics had smart phones. Most of these smart phone users had  
153 accessed a wide range of functions, including getting information about a health condition (62%) and  
154 online banking (57%). The use of online functions on smart phones is higher in lower income than higher  
155 income users.[41] Use of social media has also considerably increased.[42] Over 74% of USA Internet  
156 users use online social networks including 71% that use Facebook. Again, smart phones have decreased

## INVESTIGATOR STUDY PLAN - REQUIRED

157 the digital divide in use of social networks. A higher proportion of African Americans (48%) and Hispanics  
158 (49%) access social networks on their phones than Whites (36%).[41]

159 However, because of this lingering perception that vulnerable populations have little technology  
160 access, these populations are underrepresented in technology research. It may not be the lack of  
161 technology access, but that the dissemination strategies have not sufficiently evolved to engage these  
162 groups.

### 163 **B.3. Increasing Reach of DISCs to African American Smokers**

164 In a comparative effective study, we will test potential of peer recruitment to increase  
165 proportions of African American smokers in the sample. We focus on African American smokers for  
166 several reasons: 1) These smokers suffer disproportionately due to smoking-related diseases including  
167 several cancers, cardiovascular disease, and cerebrovascular disease.[4-10] Although they smoke fewer  
168 cigarettes and start smoking at an older age, these smokers are more likely to die from smoking-related  
169 diseases than Whites.[4] They are less likely to be successful at quitting than White or Hispanic smokers  
170 because they are less likely to seek cessation support, including DISCs.[4-7] 2) The standard CTHC in  
171 Decide2Quit successfully motivated African Americans smokers to quit. 3) Our NCI funded pilot  
172 demonstrated that peer recruitment significantly enriched the sample with African American smokers  
173 (11-23%). This increase happened without our tools prompting the peer recruitment of African  
174 American smokers. In S2S, with our patient advisory panel, we will further refine our instructions to  
175 encourage African American smokers' recruitment. Thus, we anticipate an even higher increase in  
176 proportion of African American smokers in S2S.

### 177 **B.4. Smoker-to-Smoker (S2S) peer recruitment: Peer-referrals as an online marketing Strategy**

178 Health information and healthy behaviors can be “infectious” — spreading between social  
179 contacts, creating cascading effects throughout the network.[43, 44] For example, over time, smokers  
180 in the Framingham cohort were less likely to smoke if someone in their network (spouse, sibling) had  
181 quit smoking.[44] Public health interventions can use these infectious effects by using engaged smokers  
182 to recruit their peers who smoke.[45, 46] Peer recruitment leverages current online marketing trends.  
183 Outside of public health, several marketing groups are using peer recruitment to enhance spread of  
184 products for a number of reasons. Customers are more likely to trust a peer referral than traditional  
185 advertisements.[47] Peer recruited customers are also more profitable than traditional customers.[47]  
186 There are several examples of successful peer-marketing (e.g., Zynga, the online social gaming company)  
187 on social media.[48, 49] To enhance the effectiveness and efficiency of these campaigns, companies  
188 have developed a more proactive approach, providing customers referral tools that allow them to easily  
189 refer others to the product (eg. email referral form).[50] The use of Facebook referral plugin in our peer  
190 recruitment system[51] was an example of this approach. Our peer recruitment experiment (NCI  
191 R21CA158968) to test whether smokers would recruit other smokers was successful. In a one-year  
192 period, peer recruitment quadrupled our sample —from 190 smokers to 759 smokers.[49, 52] Peer  
193 recruitment also increased proportions of not ready-to-quit and African American smokers (11-24%),  
194 groups that other recruitment techniques have had difficulty encouraging participation.

### 195 **B.5. Computer-tailored health communication (CTHC): Standard and S2S recommender**

196 Standard “if-then-else” theory-based CTHC systems: Theory-based CTHC is a tool that is  
197 frequently used to support behavior change. [53] It builds on the concepts of personal relevance,  
198 relatedness, and cultural similarity, constructs of multiple behavioral theories including the  
199 transtheoretical model, the theory of reasoned action, social cognitive theory, and self-determination  
200 theory.[54-56] Standard CTHC systems use selected variables from patients' baseline profile and if-then  
201 rules to send tailored messages to specific subsets of patients. [53, 57-61] These rules are developed by  
202 experts based on their knowledge of the targeted population, literature, and health behavior theories.  
203 These rules specify how the messages should be selected (what messages need to be sent to that  
204 patient subset).

205 Recommender CTHC systems: New approaches to tailoring based on collective-intelligence may  
206 be able to augment standard CTHC systems. Many people already encounter collective-intelligence  
207 tailoring as they interact with companies like Netflix and Amazon. These companies use a special class  
208 of machine learning algorithms (**recommender systems**) to tailor content. These systems tailor content  
209 based on collective-intelligence data (i.e., data derived from the behavior of users as they interact with

## INVESTIGATOR STUDY PLAN - REQUIRED

210 the system) in addition to user profiles.[62-64] Collective-intelligence data include implicit and explicit  
211 user feedback. Implicit data are derived from user actions (e.g., website pages and products purchased  
212 data). Explicit data consist of self-reported item ratings (e.g., ratings provided by users for items like  
213 books or movies, often on a five-star scale). However, in the health promotion arena, patients could be  
214 asked to rate relevance, influence, or other properties of a message or product. Using these data, along  
215 with user demographic characteristics, the algorithms underlying the recommender system generate  
216 personalized item recommendations for each user. As these recommender systems learn more about  
217 the user, they can continually adapt to improve the recommendations.

218 The primary difference between current and recommender CTHC systems is how the messages  
219 are selected. In standard CTHC, message selection is based on preset expert-written if-then-rules. In  
220 recommender CTHC, messages selection is based on data, i.e., recommender systems learn from the  
221 data (patient profiles and implicit and explicit feedback ratings) to select the variables and generate the  
222 rules that specify how the message will be selected. As new data about the users are collected, these  
223 recommender systems have the ability to refine the message selection algorithm. As detailed in our  
224 paper,[65] there are a number of other potential advantages of using recommender CTHC over standard  
225 CTHC systems. Our pilot experiment demonstrated that the recommender CTHC performed better than  
226 Decide2Quit’s standard CTHC, a demonstrated to be effective system, even over a short duration of 30  
227 days.

### 228 **B.6. S2S Theoretical Foundations — Relatedness and personal relevance to increase engagement and** 229 **motivation:**

230 Peer recruitment: By providing peer recruitment tools to smokers, S2S facilitates smokers to  
231 reach out to their peer smokers to participate in a cessation intervention, thereby extending the  
232 intervention’s reach. Peer recruitment draw strength from the constructs of relatedness, as proposed in  
233 self-determination theory (SDT).[66] Relatedness between individuals — the desire to feel connected to  
234 others — can support behavior change. [66, 67] When individuals engage in activities that are social in  
235 nature, such as providing social support, perceptions of relatedness play an important role in predicting  
236 motivation and increasing engagement.[68] Thus, both the peer recruitment act, and being peer  
237 recruited, might motivate the smoker to use the DISC, and quit smoking.

238 Recommender CTHC: Recommender CTHC draws strength from personal relevance,  
239 relatedness, and cultural similarity, constructs of multiple behavioral theories. Increasing the  
240 personalization of a message, increases the relevance and relatedness of the message to the user.[53]  
241 Personally relevant messages are more carefully processed, tend to be retained longer, and more  
242 predictive of behavior change.[69] By incorporating smoker’s feedback, the recommender CTHC is able  
243 to adapt and continuously improve the personalization of its messages, which can increase the DISC’s  
244 use, as well as cessation outcomes.

### 245 246 **6. INCLUSION AND EXCLUSION CRITERIA\***

247 All current smokers over 18 years of age, can read or speak English, and have Internet access at home  
248 will be eligible. Prisoners will be excluded. Pregnant women may be incidentally enrolled. In such cases,  
249 this research poses no risks to the fetus.

### 250 251 **7. STUDY-WIDE NUMBER OF SUBJECTS\***

252 NA

### 253 **8. STUDY-WIDE RECRUITMENT METHODS\***

254 NA

### 255 256 **9. STUDY TIMELINES\***

257 Each individual subject is expected to participate in the study for duration of 6 months. The anticipated  
258 duration to enroll all study participants is with an estimated date to complete this study by December  
259 31, 2019.

## INVESTIGATOR STUDY PLAN - REQUIRED

260  
261  
262  
263  
264  
265

### 10. STUDY ENDPOINTS\*

There are several data sources in this project (see Table 1 below). The primary outcome measures will be 7-day point prevalence at the 6<sup>th</sup> month follow-up (see 'S2S\_6mosurvey'). Secondary outcomes include recruitment rate, patient reported outcomes collected via the 6-month follow-up questionnaire.

| <b>Table 1: Data Collection</b>                                               |                                                                                                                                                      |                            |                                                                                                                                                           |
|-------------------------------------------------------------------------------|------------------------------------------------------------------------------------------------------------------------------------------------------|----------------------------|-----------------------------------------------------------------------------------------------------------------------------------------------------------|
| <b>Data Source</b>                                                            | <b>Data Elements</b>                                                                                                                                 | <b>Private identifiers</b> | <b>Data Stored In</b>                                                                                                                                     |
| Search Ad Manager                                                             | Online advertisement stats (no of users who saw ads, etc.)                                                                                           | NO                         | Search ad managers (Aggregate data)                                                                                                                       |
| Baseline during registration (S2S_BaselineSurvey)                             | PCORI required demographics: age, gender, race, and ethnicity. Contact information required for follow-up: first name/nickname and telephone number. | Yes                        | UMass Regulated Environment                                                                                                                               |
| Baseline at one-week post registration (online or phone) (S2S_BaselineSurvey) | Additional demographics, Participant smoking characteristics (allowing smoking at home, quit in last 12 months), Number of cigarettes/day            | No                         | UMass Regulated Environment                                                                                                                               |
| Every Decide2Quit visit                                                       | Readiness to quit, Use Of Decide2Quit                                                                                                                | Yes                        | UMass Regulated Environment                                                                                                                               |
| Every message (email or text-messaging)(See S2S_MessageExamples)              | Explicit influence ratings, message sent date                                                                                                        | Yes                        | UMass Regulated Environment                                                                                                                               |
| 1 month follow-up (online or phone) (see S2S_1MoSurvey)                       | Feedback on the messaging system For peer recruiters only: Peer recruitment                                                                          | Yes                        | UMass Regulated Environment; Survey will be entered by research staff (if conducted by phone) or subjects (if completed online) directly into our server. |

## INVESTIGATOR STUDY PLAN - REQUIRED

|                                                                       |                                                                  |     |                                                                                                                                                                  |
|-----------------------------------------------------------------------|------------------------------------------------------------------|-----|------------------------------------------------------------------------------------------------------------------------------------------------------------------|
|                                                                       | experience, perceived influence of peer recruitment on cessation |     |                                                                                                                                                                  |
| 6 <sup>th</sup> month Follow-up (online or phone) (see S2S_6MoSurvey) | 7-day point prevalence smoking cessation, number of cigarettes   | Yes | UMass Regulated Environment; Survey will be entered by research staff (if conducted by phone) or subjects (if completed online) directly into our server.        |
| 6 <sup>th</sup> month biochemical verification from saliva NicAlert®  | zone (0-6) indicating the level of cotinine in saliva            | No  | UMass Regulated Environment; Image files of the completed test will be uploaded via the Decide2Quit website, REDCap survey or emailed to a secure email address. |

266  
267

### 11. PROCEDURES INVOLVED\*

269 Online Randomization: In our prior technology-assisted randomized trials, we have embedded  
270 randomization within the technology, and we will use a similar approach in S2S. As smokers register on  
271 the website, they will be allocated to the four comparators based on a block-randomization allocation  
272 table integrated into the website. Our statistician will generate a randomization table; the  
273 randomization sequence will be conducted in random blocks of different sizes (8, 12) to ensure balance  
274 among the groups and reduce predictability of allocation process. Thus, randomization will occur  
275 automatically at the time of initial registration. Peer recruited smokers will be allocated into one of the  
276 two peer recruitment arms to minimize contamination. Due to peer recruitment, we expect to recruit  
277 more African Americans in the peer recruitment group. The types of information to be asked at the  
278 baseline and 6-month surveys include demographics, smoking characteristics (level of addiction,  
279 number of cigarettes per day, smoking environment, history of quit attempts, and readiness to quit),  
280 and 7-day point prevalence smoking cessation (6-month survey only).

#### 281 Comparators:

282 Smokers in all groups will be given access to all Decide2Quit functions. The difference in the four  
283 groups will be based on the recruitment and CTHC approaches. Our goal is to test the enhancements  
284 offered by peer recruitment and recommender CTHC over an active comparison group (recruitment  
285 using online advertisements and the standard CTHC system). We describe the comparators below.

#### 286 Standard Functions

##### 287 Online recruitment via search engine and social media advertisements:

288 Smokers will be recruited online using search engine advertisements (see S2S\_Ads). These  
289 advertisements will be customized to appear to smokers searching for quit smoking related search  
290 terms online. When smokers click on these advertisements, they will be redirected to Decide2Quit,  
291 where they will be provided study information and registration instructions. We will use the functions  
292 provided in the ad managers of the search and social media websites to target ads for smokers. For  
293 example, the Facebook ad manager allows advertisers to target users based on their interests derived  
294 from their profile's keywords, pages they like, and groups they visit. Advertisements will be displayed on  
295 the Facebook page of the user. We will work with our patient advisory panel to identify relevant  
296 interests, as well as create advertisements with content that will be attractive to smokers. We will  
297 continuously monitor and refine these advertisements with our patient panel.

298 Other recruitment online websites include [www.smoke.free.gov](http://www.smoke.free.gov) and [www.researchmatch.org](http://www.researchmatch.org).  
299 On the [www.smokefree.gov](http://www.smokefree.gov) website, under the "join a research study" tab, we will provide the name of

## INVESTIGATOR STUDY PLAN - REQUIRED

300 our study, a link to the study website and a one-paragraph description of the study (see  
301 S2S\_smokefree). The link listed on [www.smokerfree.gov](http://www.smokerfree.gov) will direct smokers to the Decide2Quit website.

302 Research Match, [www.researchmatch.org](http://www.researchmatch.org), is a website funded by the National Institutes of  
303 Health (NIH) and aims to serve as an effective and complementary tool that helps connect willing  
304 volunteers with researchers. Using research match search engine, we will search for appropriate  
305 matches (according to S2S study eligibility criteria) amongst the non-identifiable research match  
306 volunteer profiles in the system. Research match volunteers who are eligible to participant in our study  
307 will receive an invitation letter (S2S\_researchmatch\_invitationletter) that will provide more information  
308 about S2S. Email recipients will have the opportunity to review the invitation letter, and decide whether  
309 they would like participant in the study or not.

### 310 Standard CTHC

311 The difference between the standard and recommender CTHC is how messages are selected.  
312 Our study goal is to test the ability of the two systems to select influential messages for individual  
313 subjects. Thus, both messaging systems will use the same message database. We plan to send 2  
314 messages weekly in the first four weeks of the intervention. We will then send 1 message per week until  
315 the smoker completes six months in the intervention (from registration date of a smoker). Below, we  
316 first describe the messaging database and then the standard CTHC system.

### 317 The Motivational Messaging database:

318 The messaging database includes 500 messages that were developed in our prior RCT and  
319 includes both expert-written messages and peer-written messages.[73] Expert-written messages  
320 (behaviorists, physicians, nurses) were developed through an iterative expert group review process.  
321 These messages were informed by current guidelines[74] and Social Cognitive Theory.[75] The current  
322 guidelines provided evidence-based content on successful cessation strategies. The Social Cognitive  
323 Theory, which incorporates vicarious learning and verbal persuasion, guided the writing of the expert  
324 messages. Messages reflect theoretical determinants of quitting, such as positive outcome expectations  
325 and self-efficacy enhancing small goals.[75] Peer-written messages were written by current and former  
326 smokers responding to an online survey that presented four scenarios tailored by gender, age and  
327 readiness-to-quit. These messages were then reviewed for use in our system. More details of our  
328 methodology to generate peer written messages has been previously published.[73] (See  
329 S2S\_MessageExamples).

### 330 Standard Decide2Quit CTHC System:

331 As noted, our comparison standard CTHC is a rule-based (if-then-else) system that tailors  
332 messages based on a smoker's readiness to quit. For example, when a smoker logs on to Decide2Quit  
333 and indicates his readiness as "not ready to quit", then a message from those categorized for "not ready  
334 to quit" smokers will be picked at random and sent to the smoker. Similarly, if the smoker indicates his  
335 readiness as "set a quit date", then a message categorized for "set a quit date" smokers will be sent to  
336 the smoker. The messages can either be sent via emails or text messages.

### 337 S2S Functions

#### 338 Peer Recruitment:

339 Peer recruitment will start with the standard online recruitment of seeds (first wave). These seeds  
340 and subsequent waves of smokers (peer recruits) will be provided the peer recruitment toolset to  
341 recruit others. This toolset will not be used until we have IRB review and approval. The peer  
342 recruitment toolset includes a Facebook website plugin, an online training video, and a recruitment  
343 tracker. Our Facebook website plugin was developed in our NCI-funded pilot (R21CA15896).[49, 51] The  
344 Facebook plugin will allow smokers to browse through their Facebook friends and recruit them by  
345 sending private recruitment messages. Smokers will also be able to peer recruit through text messages  
346 and emails. The online training video will teach the recruiter how to use available tools to recruit other  
347 smokers from their social network. The recruitment tracker will allow smokers to track successful peer  
348 recruitment. To encourage recruitment, the system also will email or text a weekly recruitment report to  
349 the potential recruiter. Peer recruitment will happen in waves. As is common in peer recruitment  
350 approaches, to initiate the waves, we will recruit the first wave (wave 0 or seeds) of smokers (both  
351 current and former smokers). Similar to comparison, seeds will be recruited using online



## INVESTIGATOR STUDY PLAN - REQUIRED

- 352 advertisements. Once a seed registers on Decide2Quit and receives the peer recruitment toolset, we  
353 expect the following steps:
- 354 1. The seed consents to be in the study (See S2S\_Consent) and recruit smokers from his/her network  
355 using the peer-recruitment tools (by sending a Facebook private message).
  - 356 2. The successfully peer-recruited smoker (Wave 1 recruit) registers on the system and consents to  
357 then recruit other smokers in their social network.
  - 358 3. The Wave 1 recruit then continues the peer-recruitment chain, recruiting smokers from their  
359 social network.
  - 360 4. The successfully peer-recruited smoker then registers (Wave 2 recruit).
  - 361 5. The waves progress until the target sample size is reached.

362 In addition to supporting the smokers' ability to recruit via Facebook by sending a message, we will also  
363 support recruitment messaging via emails and text-messaging to further expand reach in this study.

### 364 Recommender CTHC system:

365 The difference between the standard and the recommender CTHC is the approach to message  
366 selection and not the messages. We will use the same motivational messages as the standard CTHC  
367 system. Our recommender CTHC system is a hybrid recommender system. We chose a hybrid approach  
368 because they merge the strengths of content-based and collaborative filtering recommender  
369 systems.[76] Thus, they can potentially benefit from expert-driven rules (content-based), and the  
370 recommender algorithms. Our hybrid recommender system uses three input data sources to generate  
371 the recommendations, including the 1) metadata description of the messages, 2) implicit, and 3) explicit  
372 feedback data (smokers in prior and current study). Our metadata includes a comprehensive coding of  
373 the messages. Implicit feedback data are derived from user actions. As our implicit feedback data, we  
374 used the website return data of 900 smokers that participated in our prior RCT.[3] When an email was  
375 sent to these smokers, we tracked their website usage in the days following the email. Thus, we had  
376 data on the frequency at which each message promoted use of Decide2Quit, and the characteristics of  
377 the smokers that received these messages.

378 Explicit feedback data consists of self-reported item ratings. Two pilot studies were used to  
379 generate the explicit feedback data for recommender CTHC.[77] In addition to explicit feedback ratings  
380 from smokers in prior studies, the recommender CTHC is programmed to also use the explicit ratings of  
381 smokers receiving the messages. Thus, when a smoker is sent an email, we will include a link to rate the  
382 message on the influence scale. Although our standard CTHC does not adapt to this feedback, we will  
383 include the ratings question in the standard CTHC messages to minimize group differences.

### 384 Patient-centered outcome measures:

385 S2S will include multiple data collection stages (Table 2). At each time point (one week, one-  
386 month and six months) we will send participants email reminders to complete the online follow-up  
387 surveys. We will send up to 4 email reminders over the course of two weeks from the targeted follow-up  
388 date (e.g., if the participant is due for their 6 month follow-up on January 1<sup>st</sup>, we will send them  
389 reminders for the two weeks following that date). If participants fail to respond to our email messages,  
390 we will call them to complete the survey over the phone. For all participants (N=480) who did not  
391 initially respond to our six-month follow-up correspondence, we would still be seeking to ascertain the  
392 original end-point of six-month follow up and would be extending the follow-up window to potentially a  
393 maximum of 18 months. We will target participants who are more than 2-3 months outside their  
394 six-month follow-up window.

395 We are planning to start calling them 2 months after their six-month window closes. We will  
396 send 1 email followed by 4 phone calls over a course of three weeks. At the end of the 4<sup>th</sup> call attempt  
397 we are planning to leave a short voice mail, including our name and state that we will call again.  
398 (We will leave our phone number if the participant would prefer to call us back). These phone  
399 calls will be completed between business hours (10:00am-4:00pm), excluding early mornings.  
400 To see the text for the email invitations and the intro script for the telephone calls refer to the  
401 S2S\_Invitation\_For\_Followup.docx.

## INVESTIGATOR STUDY PLAN - REQUIRED

402 All participants (N=704) who completed the six-month follow-up survey will be offered the opportunity  
 403 to voluntarily participate in an online survey. (*COVID-19 related smoking survey\_5.4.2020*). Primary  
 404 purpose of this survey is to understand how smokers (and vapers) are perceiving the risks of COVID and  
 405 to evaluate how social isolation has impacted their lives and mental health and how all this has affected  
 406 their smoking and vaping.  
 407 Survey will be sent to participants via email, 4 times, over a two-week period (*S2S email*  
 408 *Invitation\_COVID19\_4.24.2020*). Compensation will be provided in a form of \$10 gift card upon  
 409 completion of the survey.

410  
 411 We developed our outcome measures based on over 15 years of DISC research with smokers.[2, 51, 52,  
 412 78-80] To appropriately measure dissemination, we need both recruitment and use measures. We also  
 413 will test effectiveness in this study. Our primary measures are described below:

### 414 **Measures:**

415 **Recruitment time:** When smokers register on Decide2Quit, they will be assigned a unique identifier and  
 416 their registration date and time will be recorded. We will compute recruitment time from this data as  
 417 the time taken to recruit each participant from the time that the first participant in the group was  
 418 recruited. (see equation below).

$$\text{Recruitment time } T_i = X_i - X_1$$

where  $X_i$  is date of registration of  $i^{\text{th}}$  participant;  $X_1$  is the date of registration of  $1^{\text{th}}$  participant.

419 **Repeated Use:** We use repeated use over other use measures (number of logins) because of the  
 420 demonstrated association with smoking cessation.[30] This is an ordinal scale of number of Decide2Quit  
 421 functions used after the first DISC visit (0: no functions used; 1: use of 1-2 functions, 2: > 2 functions  
 422 used).

### 423 **Effectiveness Measures:**

424 **7 day point prevalence cessation:** 7 day  
 425 point prevalence will be assessed at six  
 426 months using: Do you currently smoke  
 427 cigarettes (smoked even 1 puff in the last 7  
 428 days)?[82] The 7-day window provides an  
 429 appropriate stringent measure to account for  
 430 a cross-sectional snapshot.

### 432 **Optional biochemical verification by saliva**

433 **test NicAlert®:** Subjects indicating that they  
 434 have quit at the 6-month follow-up survey  
 435 will be given the chance to provide  
 436 biochemical verification using the NicAlert®  
 437 test (Nymox Corporation). NicAlert® is a  
 438 semi-quantitative method that uses a dipstick  
 439 to measure the level of cotinine in a sample  
 440 of saliva. The test strip displays the result in  
 441 seven zones. Each zone represents a range of levels of cotinine/smoking [e.g. zone 0 (0–10 ng/mL, a  
 442 nonsmoker) to zone 6 (>1000 ng/mL, a heavy smoker)]. The results will be read as 0-6, and as  
 443 recommended, any value  $\geq 1$  will be considered as tobacco use.[83-85] We will mail the strips with clear  
 444 instructions on how to take a picture and return the picture of the results to us electronically. Our staff  
 445 will also be available by phone to help the smokers complete testing.

447 **Risk reduction or the reduction in the number of cigarettes smoked:** We will calculate risk reduction  
 448 using the below formula:

$$\text{Risk reduction} = \text{Number of cigarettes smoked at follow-up} - \text{Number of cigarettes smoked at baseline}$$

| Table 2: Key Data Elements                | Search Ad Manager | Baseline during registration or one week | Every Decide2Quit visit | Every email message | 6 <sup>th</sup> month Follow-up (Online or phone) |
|-------------------------------------------|-------------------|------------------------------------------|-------------------------|---------------------|---------------------------------------------------|
| Online advertisement stats                | X                 |                                          |                         |                     |                                                   |
| Demographics                              |                   | X                                        |                         |                     |                                                   |
| Participant smoking characteristics       |                   | X                                        |                         |                     |                                                   |
| Number of cigarettes/day                  |                   | X                                        |                         |                     | X                                                 |
| Readiness to quit                         |                   | X                                        | X                       |                     |                                                   |
| Use of website                            |                   |                                          | X                       |                     |                                                   |
| Explicit influence ratings                |                   |                                          |                         | X                   |                                                   |
| 7-day point prevalence                    |                   |                                          |                         |                     | X                                                 |
| Biochemical verification saliva NicAlert® |                   |                                          |                         |                     | X                                                 |

## INVESTIGATOR STUDY PLAN - REQUIRED

449

### 450 **12. DATA AND SPECIMEN BANKING\***

451 NA

452

### 453 **13. Data Analysis and Management\***

#### 454 **Sample Size and Power Calculations:**

##### 455 H1A:

456 In our NCI-funded pilot (R21CA15896),[49, 51], peer recruitment increased the proportion of  
457 African Americans to 23%, compared to 11% in the initial seeds (those recruited by advertisements).  
458 Using 10% as the base rate in the non-peer recruitment group (recruitment by online advertisements),  
459 we estimated sample size requirements varying the proportion in the peer recruitment from 16 to 20%.  
460 With these assumptions, we will need 219 smokers in each group to detect difference of 10% (power =  
461 80%, alpha=.05). If we reduce the difference to 8% and 6%, we will need 319 and 525 in each group  
462 respectively. Given that we will work with our panel to encourage recruitment of African American  
463 smokers in the peer recruitment group and may see bigger differences than our pilot, we will have  
464 adequate power particularly with the proposed sample size of 600 in each recruitment method.

##### 465 H1B:

466 In the NCI pilot (R21CA15896),[49, 51] we estimated that the mean number of days to recruit a  
467 sample of 700 smokers was 244 days with a standard deviation of 81. Assuming that peer recruitment  
468 proceeds with the same rate and with the same standard deviation, we can detect a difference in  
469 recruitment time as low as 14 days. Since we expect the comparison rate to be much slower, we are  
470 adequately powered to detect differences with a sample of 600 (power=0.8). Calculations were made in  
471 STATA.[89]

##### 472 H2:

473 We used the method published by Whitehead to calculate power for this hypothesis.[90] As  
474 noted above, in our prior RCT (1R01CA129091), we found a linear association with six-month cessation  
475 using the repeated use scale. For every increase by one in this scale, odds of smoking cessation  
476 increased (OR= 2.10, 95% CI = 1.03, 4.30),[30] with the current sample size of 300 per group for H2A,  
477 we can detect a difference a cumulative odds ratio of 1.7. Thus, our study is adequately powered to  
478 measure a reasonable difference in the repeated use measure. Power for these hypotheses is driven by  
479 H2A, as this analysis is looking at the smaller sample (fully enhanced). For H2B and H2C, power is even  
480 greater, as the sample size is 850 per group for each.

##### 481 H3:

482 **Quit:** We assumed a control cessation rate of 15%,[91] a two-sided significance level of 0.05. A  
483 sample size of 300 in each group (H3c) will achieve 80% power to detect a difference of 9% (quit rate in  
484 intervention=24%) in quit rates between the two groups, based on a Z-test with pooled variance. We  
485 will categorize the NicAlert® test results into smokers and non-smokers and use the Chi-Square statistic  
486 to test for differences.

487 **Risk Reduction:** We calculated the detectable difference in risk reduction with 300 smokers in  
488 each group and the mean in the comparison group of 3.3 using standard deviations of 2 and 3 with 80%  
489 and 90% power. We will have 90% power to detect a difference of 0.80 (or smaller) number of cigarette  
490 smoked reduction between two groups. This difference is likely to be achieved based on the results of  
491 our PCORI pilot in which we achieved a reduction of 0.85 (4.15 to 3.3) in 30 days; compared to smokers  
492 receiving the standard CTHC messages, smokers receiving the recommender CTHC had a higher  
493 reduction in number of cigarettes at 30 days (Standard CTHC: mean 3.3; *S2S adaptive CTHC*: 4.15).

#### 494 Analytical Plan

495 To preserve randomization, all primary analyses will be on an intent-to-treat basis. Secondary  
496 analyses will explore dose-response effects among those with variable levels of adherence to the  
497 intervention. All analyses will be two-sided and alpha error will be set at 0.05. We will begin our analysis  
498

## INVESTIGATOR STUDY PLAN - REQUIRED

499 by examining univariate statistics (means, medians, standard deviations and 95% confidence intervals)  
 500 and distributions. We will examine the balance of participant characteristics by study groups and  
 501 account for any imbalances in our multivariable analysis. The 2x2 factorial design will result in 4 study  
 502 groups (**A: Fully enhanced; B: Recommender CTHC only; C: Peer recruitment only; D: Standard**). As  
 503 appropriate, differences in measured characteristics (i.e., demographics and pre-baseline smoking  
 504 behaviors) by group will be tested using chi-square tests of independence (categorical variables), ANOVA  
 505 (continuous variables) or the equivalent non-parametric tests depending on the distribution of the  
 506 variables. Per best practice, differences in baseline characteristics of the intervention and comparison  
 507 groups will be assessed.[92, 93]

508 **H1A:**

509 Based on our pilot, we anticipate that peer recruitment will be more effective in recruiting  
 510 African Americans. To test this, we will categorize the smokers as either African Americans or not, and  
 511 then use the Chi-Square statistic to test for differences between the peer recruitment and standard  
 512 groups

513 **H1B:**

514 We will compare mean recruitment time between the two types of recruitment method using a  
 515 t-test. We will then develop a linear regression model to adjust for possible confounders such as  
 516 covariates that are not balanced between the smokers recruited from the two methods as well as  
 517 important predictors of recruitment. Within the peer recruitment group, we will conduct a secondary  
 518 analysis examining differences in demographic characteristic between peer recruited and directly  
 519 recruited smokers. Using data provided by search engine advertisement managers, we will evaluate the  
 520 performance of our online advertisements (number of users registered on Decide2Quit following an  
 521 advertisement on the search engine).

522 **H2:**

523 As noted above, we will have four study groups: (A: Fully enhanced; B: Recommender CTHC  
 524 only; C: Peer recruitment only; D: Standard). We will use the following generalized linear model, which  
 525 includes indicators of peer recruitment and recommender CTHC and the interaction between the two  
 526 indicators as independent variables, to test H2A:

$$E(f(u)) = b_0 + b_1 \times P + b_2 \times R + b_3 \times P \times R$$

+ *potential confounders (demographics, readiness to quit)*

where  $u$  is the outcome measure (repeated use measure), the function  $f(u)$  depends on the distribution of  $u$ ,

$P=1$  for peer recruitment,  $=0$  for standard recruitment,  $R=1$  for recommender CTHC,  $=0$  for standard CTHC.

The adjusted  $f(u)$  (i.e., adjusting for the potential confounders) for each of the 4 groups can be expressed in terms of the regression coefficients defined in the box below.

| A                       | B           | C           | D     |
|-------------------------|-------------|-------------|-------|
| $b_0 + b_1 + b_2 + b_3$ | $b_0 + b_2$ | $b_0 + b_1$ | $b_0$ |

527 In the model,  $b_2 + b_3$  is the estimated difference between group A (peer recruitment and  
 528 recommender CTHC) and group C (peer recruitment only);  $b_1 + b_3$  is the estimated difference between  
 529 group A and group B (recommender CTHC only); and  $b_1 + b_2 + b_3$  is the estimated difference between  
 530 group A and group D (standard). Significant positive values of the estimated differences will support  
 531 H2A. In the event that there is an interaction effect between the two S2S enhancements (peer  
 532 recruitment and recommender CTHC), i.e.,  $b_3$  is significantly different from zero, H2B and H2C will be  
 533 tested by comparing groups C vs. D (peer recruitment alone vs. standard Decide2Quit; estimated by  $b_1$ )  
 534 and groups B vs. D (recommender alone vs. standard Decide2Quit; estimated by  $b_2$ ). If there is no  
 535 interaction effect, i.e.  $b_3$  is not significantly different from zero the following model will be used to test  
 536 H2B and H2C:

537  $E(f(u)) = a_0 + a_1 \times P + a_2 \times R + \text{potential confounders (demographics, readiness to quit)}.$

## INVESTIGATOR STUDY PLAN - REQUIRED

538 In the model,  $a_1$  is the estimated effect of peer recruitment  $[(A+C) - (B + D)]$ ;  $a_2$  is the estimated effect  
539 of recommender CTHC  $[(A+B) - (C+D)]$ . A significant positive value of  $a_1$  or  $a_2$  will support the  
540 hypotheses of positive effects of these two individual components respectively (H2B and H2C).

541 We will examine the distribution of the dependent variable  $u$  to determine the link function to  
542 be used in the generalized linear model. In our previous study, we used an ordinal variable for the  
543 dependent variable Repeated Use with log link function to fit an ordinal logistic regression.[30]  
544 We will also conduct a secondary analysis using the influence ratings. As noted above, both standard  
545 and recommender CTHC will include a link to rate the messages on the influence scale. For this analysis,  
546 the dependent variable for each smoker is the mean of all influence ratings (an influence score) and the  
547 independent variable is study arm [recommender (A+B) or standard CTHC (C+D)]. We predict that the  
548 mean influence score will be higher in recommender CTHC than the standard CTHC arm. For this  
549 analysis, we will start with a t-test for differences in mean, but acknowledge that the influence scores  
550 may not be normally distributed and only approximate a continuous variable. Thus, we will use a  
551 Wilcoxon rank-sum.

552 As noted, for both H2 and H3, we will also compare African American smokers across the  
553 groups, and African American and White smokers to test for heterogeneity of effect. This will provide us  
554 important data for design future interventions.  
555

### 556 **14. PROVISIONS TO MONITOR THE DATA TO ENSURE THE SAFETY OF SUBJECTS\***

#### 557 **Data and Safety Monitoring Plan**

558 The risks associated with the data collection and participation in this study are not high. To that  
559 end the purpose of this Data and Safety Monitoring Plan (DSMP) is to specify the procedures  
560 and rationales of the current study to ensure the safety of participants' data and the validity and  
561 integrity of the data.

562  
563 The primary risk to subjects is the accidental disclosure of information; however, every  
564 precaution will be taken to prevent this and the study team has an excellent track record of  
565 protection of confidential data. The data will be stored in a HIPAA compliant UMass regulated  
566 environment and access will be only through a secure VPN network. The UMASS Medical  
567 School Regulated environment provides applications a secure network for confidential data.  
568 The Regulated environment has been securely configured to allow application access via the  
569 secure socket layer (HTTPS) protocol — a protocol that delivers server authentication, data  
570 encryption, and message integrity. The setup of Regulated environment provides the needed  
571 security protocols for the regulatory and Federal standards required. The Regulated  
572 environment is secured using hardware and software firewalls, along with access restrictions to  
573 enforce governmental policies requiring to enforcement.

574  
575 In no way will individual participant data be released to the public or cited in a publication. Our  
576 group has substantial experience with implementing these methods successfully. Our  
577 interaction with participants is minimal, and all data will remain confidential and only reported in  
578 aggregate.

579  
580 To further mitigate risk have minimized data collection to that which is needed to answer the  
581 study hypotheses. We will have stringent protection against breach of confidentiality using  
582 secured servers and locked office spaces for data entry at UMMS. The research coordinator will  
583 do periodic checks to ensure that participant confidentiality is protected at all stages of data  
584 management and analysis. At the start of the study all project team members will be trained in  
585 practices that ensure participants' confidentiality and privacy. There are no health or safety risks  
586 for participation in the S2S study.

## INVESTIGATOR STUDY PLAN - REQUIRED

587  
588 To monitor the validity and integrity of the data, the Decide2Quit platform has a database  
589 administration site. The admin site will contain data collection reports to be used for the ongoing  
590 monitoring of data in the database. The PI, Dr. Sadasivam, the biostatistician Dr. Chang, and the  
591 analyst Ms. Orvek will regularly review database admin reports to inspect for data collection  
592 completeness. Furthermore study recruitment and retention will be monitored using the  
593 aggregated summary reports available on the admin site.  
594

### 595 **15. WITHDRAWAL OF SUBJECTS WITHOUT THEIR CONSENT\***

596 NA

### 597 **16. RISKS TO SUBJECTS\***

598  
599 The risks of the study are not high, and thus the safety monitoring plan has been matched to the  
600 risk to subjects in this study. The major risk is the accidental disclosure of information; however, every  
601 precaution will be taken to prevent this and the study team has an excellent track record of protection  
602 of confidential data. There may be some stress involved in completing the follow-up survey, but we will  
603 emphasize that this participation is voluntary.  
604

### 605 **17. POTENTIAL DIRECT BENEFITS TO SUBJECTS\***

#### 606 **Potential Benefits of the Proposed Research to the Subjects and Others**

607  
608 The major benefit to smokers is the additional resources to encourage smoking cessation and the  
609 potential for supporting cessation attempts resulting in quitting smoking and the resulting health  
610 benefits.  
611

### 612 **18. VULNERABLE POPULATIONS\***

613 NA

### 614 **19. MULTI-SITE RESEARCH\***

615 NA

### 616 **20. COMMUNITY-BASED PARTICIPATORY RESEARCH\***

617 NA

618 **21. SHARING OF RESEARCH RESULTS WITH SUBJECTS\***In addition to the dissemination methods  
619 described below, we plan on sharing results with study subjects as instructed by PCORI. We will do so by  
620 sending a summary of aggregate findings containing no identifiable information once the study is  
621 completed to the email address provided by subjects at the time of enrollment.  
622

623  
624 Additional dissemination methods of research results include:

- 625 • Presentation and Publications: We have an exemplary track record in publishing and presenting  
626 results from our funded studies. We will diligently apply this experience and skill to disseminate S2S  
627 results. In addition to presenting our findings at scientific meetings and in peer-reviewed literature,  
628 we will also present key findings at community-based meetings, on our webpage, and social media  
629 sites. Our patient panel will be an integral part of this effort.  
630  
631  
632

## INVESTIGATOR STUDY PLAN - REQUIRED

- 633 • Community-based outreach: With our patient panel, we will develop lay summaries and marketing  
634 materials and start identifying opportunities for continued dissemination of Decide2Quit and S2S  
635 tools in community-based settings. Dr. Allison (key investigator) is the lead of the Special Population  
636 Resource Center, of the UMass Clinical and Translational Science Center, as well as the Vice Provost  
637 for Health Disparities research. Under his leadership, UMass is developing relationships with several  
638 local and national community organizations (MOSAIC is one example). Dr. Allison will continue to  
639 support our efforts to identify different groups with whom we can collaborate to disseminate  
640 Decide2Quit. We have specifically recruited the MOSAIC cultural complex to serve in our panel to be  
641 able to start building bridges with local communities and explore opportunities to disseminate  
642 Decide2Quit. MOSAIC is working with several ongoing studies at UMass and is committed to the  
643 effort of integrating evidence-based tools into their communities to help decrease health disparities.
- 644 • Integration with EHR/PHR and other healthcare settings: We will also take a proactive approach to  
645 dissemination of the tools leveraging our past research. In our prior RCT, [2, 3, 94, 95] we tested an  
646 electronic referral system to market Decide2Quit. As smokers were seen by their primary care  
647 providers, providers were trained to refer them into Decide2Quit website by entering their email  
648 address into a secure form. Once e-referred, Decide2Quit website sent them up to 10 emails  
649 encouraging their participation into the study. This project was highly successful. We had 2166  
650 referrals from 74 practices, out of which, 672 smokers registered. The next step in this approach is  
651 to link the e-referral to EHRs around the country. We have several national connections with the  
652 Veterans Health Administration (VHA) and healthcare systems through our Clinical and Translational  
653 Sciences Award. Through these connections, we will explore adapting the e-referral system to their  
654 environment. In our PCORI pilot (1P2P1000582), we also experimented with identifying smokers in  
655 the EHR and mailing them for participation in the study. As the majority of smokers see a healthcare  
656 provider, this is potentially a powerful approach for disseminating Decide2Quit tools. We will again  
657 make use of our national connections to assess interest in this approach in various healthcare  
658 systems.
- 659 • Other social media opportunities: During initial conversations, our patient panel members were  
660 excited about the use of social media outlets (e.g., Twitter, Facebook) for dissemination and  
661 outreach with study participants (see below). Dr. Sadasivam is the social media chair of the Society  
662 of Behavioral Medicine and has expertise in developing social media campaigns. For example, we  
663 will create a twitter group and work with our patient panel to develop tweets. In previous work,[96]  
664 we found that Twitter tobacco cessation groups whose tweets had a higher frequency of  
665 socioemotional support and encouraging/engaging tweets had higher followership. We will use  
666 these findings to increase the followership of our group. Our study participants will also be invited  
667 to subscribe to social media channels after they complete the study (see below), and we will use  
668 these mediums to disseminate study results. We will also feature the intervention as part of the  
669 social media outreach program of our National Institute on Minority Health and Health Disparities  
670 funded Center for Health Equity Intervention (CHEIR). Dr. Allison is the lead of CHEIR, and Drs.  
671 Sadasivam and Houston play a lead role in shaping the social media outreach of CHEIR.
- 672 • Other media opportunities: Dr. Houston's previous interventions have been incorporated into the  
673 Innovations Exchange. Our work have been featured in the in the New York Times,[97] the Boston  
674 Globe,[98] Time Magazine,[99] and Wall Street Journal.[100] We will continue to explore  
675 opportunities to have our results featured in these outlets.
- 676 • Technological advancements to support dissemination: As noted (Section C.6.3), we will pursue  
677 technological advancements of the S2S tools to further their dissemination potential. With our  
678 colleagues at the Center for Intelligent Information Retrieval (CIIR) at UMass Amherst (Dr. Marlin),  
679 we will develop targeted peer recruitment strategies using algorithms to identify potential "best"  
680 recruiters. Instead of pursuing everyone, this will allow dedicating resources to further the potential

## INVESTIGATOR STUDY PLAN - REQUIRED

681 of these recruiters. This will also support targeting those that can best reach a vulnerable  
682 population. We will continually work to enhance the recommender CTHC algorithm, including  
683 tailoring the timing of the message delivery, and incorporating additional real-time information from  
684 sensors.

### 685 686 **22. SETTING**

687 Smokers will be recruited online using search engine advertisements. These advertisements will be  
688 customized to appear to smokers searching for quit smoking related search terms online. When smokers  
689 click on these advertisements, they will be redirected to Decide2Quit, where they will be provided study  
690 information and registration instructions. We will use the functions provided in the ad managers of the  
691 search and social media websites to target ads for smokers. For example, the Facebook ad manager  
692 allows advertisers to target users based on their interests derived from their profile's keywords, pages  
693 they like, and groups they visit. Advertisements will be displayed on the Facebook page of the user. We  
694 will work with our patient advisory panel to identify relevant interests, as well as create advertisements  
695 with content that will be attractive to smokers. We will continuously monitor and refine these  
696 advertisements with our patient panel. All additional study activities will occur virtually, such as via  
697 phone calls, emails, and text messaging. Data analysis will be conducted in a private setting at UMass  
698 Medical School. Analyses will be completed using UMass protected computers in a secure environment.  
699

### 700 701 **23. RESOURCES AVAILABLE**

702 Principal Investigator: (will devote 25% effort or 3.0 calendar months in years 1 and 2 and 25% effort or  
703 2.25 calendar months for 9 months in year 3 of the project due to the dedicated effort for peer review)

704 The PI is an Assistant Professor in the Division of Health Informatics, QHS. The components in this grant  
705 were developed in the PI's prior grants. The PI was the PI of the Share2Quit chain referral study (NCI  
706 R21CA158968), in which he developed and evaluated the S2S peer recruitment tools. Based on this  
707 work, he published 2 manuscripts, and a 3rd manuscript is under review. He is also a recent awardee of  
708 a National Cancer Institute K07 award (2nd year). The goal of his NCI K07 award is to train in cancer  
709 health behavior, health communication, and technology intervention design, and analysis to further  
710 innovate on the S2S adaptive CTHC system. As such, the SES proposal is very much in line with the PI's  
711 training and research goals. The PI will be responsible for the overall conduct of the study.

#### 712 713 Co-Investigator #1

714 (Co-Investigator #1 will devote 20% effort or 2.4 calendar months in all years of the project)

715 Co-Investigator #1 has gained national recognition for his health informatics research with a specific  
716 focus on patient informatics and is current director of the Behavioral Informatics special interest group  
717 of the Society for Behavioral Medicine. Co-Investigator #1 has been PI of two NIH-funded R01 tobacco  
718 control grants (R01DA017971 and R01CA129091). He has published articles on tobacco epidemiology,  
719 social networking, health services delivery, research methods, and intervention to reduce tobacco use.  
720 Because of his specific expertise in tobacco control and technology assessment, Co-Investigator #1 was  
721 asked to be a Deputy Editor of the prestigious journal, *Medical Care*. He is a fellow of the Society of  
722 Behavioral Medicine and the American Medical Informatics Association. Co-Investigator #1 was key  
723 personnel in our NCI funded Share2Quit chain referral study (NCI R21CA158968), which this project  
724 builds on. He was also the PI of the PCORI project in which we developed the S2S adaptive CTHC system  
725 (IP2P1000582). Co-Investigator #1 and the PI have collaborated for over 12 years developing the  
726 Decide2Quit.org DISC and the S2S functions, and will continue their collaborations in this grant. This  
727 individual will neither interact with subjects nor access private identifiable information about them.  
728

729 Co-Investigator #2: (will devote 10% or 1.2 calendar months in all years of the project)



## INVESTIGATOR STUDY PLAN - REQUIRED

730 Co-Investigator #2 is the director of the UMass Center for Health Equity Intervention Research (CHEIR),  
731 which is funded by the National Institute of Minority Health and Health Disparities to both develop new  
732 disparity-reducing interventions and to enhance the diversity of the biomedical research force by  
733 training the next generation of scientists from under-represented backgrounds. Co-Investigator #2 has  
734 made an increasing commitment to health disparities research and health equity interventions and has a  
735 strong interest in understanding the root causes of health disparities and developing community-  
736 informed interventions based on this understanding. In this project, Co-Investigator #2 will advise the PI  
737 on how best to target recruitment and engagement of African American study population. This  
738 individual will neither interact with subjects nor access private identifiable information about them.  
739

740 Statistician: (will devote 25% effort or 3 calendar months in year 1, 10% effort or 1.2 calendar months in  
741 year 2, and 25 % or 3.0 calendar months in year 3 of the project)  
742 The Statistician has a broad, yet robust background in statistics and survey methods. She has experience  
743 applying statistical techniques to the fields of epidemiology and health services research, and to topics  
744 within each of these, including measurement/surveillance of disease outcomes, disparities in health  
745 care, adoption of Electronic Health Records, impact of clinical tools, and survey research, and global  
746 health. A senior faculty member of the Quantitative Methods Core, the Statistician will direct the  
747 statistical analyses for evaluating processes and outcomes. This individual will neither interact with  
748 subjects nor access private identifiable information about them.  
749

750 Consultant: (will devote 15% effort or 1.8 calendar months in all year 1 and 3, and 1.2 calendar months  
751 or 10% effort in year 2 of the project)  
752 The Consultant is the director of the Tobacco Consultation Services at the UMass Memorial Medical  
753 Center (UMMC). He is also an Adjunct faculty at the Department of Psychiatry at the UMass Medical  
754 School. He has been certified as a Master Level Tobacco Treatment Specialist for over 11 years and holds  
755 additional certifications and licenses as an Addictions Specialist, an Independent Alcohol and Drug  
756 Counselor and Social Worker. In his role as a tobacco treatment specialist at the UMass Memorial  
757 Medical Center, he counsels smokers daily at both inpatient and outpatient settings. The consultant has  
758 extensive experience in tobacco dependence treatment in his role in oversight of the tobacco and  
759 smoke-free campus movement for both UMass Memorial Health Care and the University of  
760 Massachusetts Medical School. The consultant will participate in our patient and stakeholder advisory  
761 panel, and will provide input on all phases of the project. This individual will neither interact with  
762 subjects nor access private identifiable information about them.  
763

764 Programmer: (will devote 30% effort or 3.6 calendar months in year 1, and 15% effort or 1.8 calendar  
765 months in years 2 and 3 of the project)  
766 The programmer has developed the S2S tools under the supervision of the PI. In this project, her role  
767 will be limited to integrating the new randomization design in the D2Q DISC (year 1), and for  
768 maintenance of the system in years 2 and 3.

769 Analyst:  
770 Under the supervision of Biostatistician, the analyst will conduct the statistical analysis for the three  
771 hypotheses described in the proposal at 25% effort or 3 calendar months in year 1, 10% effort or 1.2  
772 calendar months in year 2 and 50% or 6 calendar months in year 3.  
773

774 Project Director: (will devote 50% effort or 6.0 calendar months in all years 1-2, and then 50% effort or  
775 4.5 calendar months in year 3 for 9 months due to the dedicated effort during the peer review period of  
776 the project)  
777

## INVESTIGATOR STUDY PLAN - REQUIRED

778 The project director will be managing our Research Coordinator and Assistant to implement all aspects  
779 of the study protocol including the follow-up, data collection, overseeing the distribution of incentives  
780 to participants, and directing the study staff in any other needed areas. Along with the PI, the project  
781 director will work with the patient and stakeholder researchers to ensure that they understand all  
782 aspects of the research study.

783  
784 Research Coordinator #1: (will devote 100% effort or 12.0 calendar months in year 1-2, and 50% or 4.5  
785 calendar months for 9 months due to the peer review period in year 3 of the project.

786 Under the direction of the project director, Research Coordinator #1 will participate in all phases of  
787 patient recruitment and patient telephone follow-up. She will be an active study staff member and will  
788 specifically be responsible for coordinating participant follow-up. She will work closely with PI and  
789 project manager to design and print materials required for the project and prepare all IRB and human  
790 use protocol materials, ensuring annual renewal of IRB approval.

791  
792 Research Coordinator #2: (will devote 50% or 6.0 calendar months in year 1 and 9 calendar months or  
793 75% in years 2 & 3 due to the data collection in year 2&3)

794 Research Coordinator #2 is an active study staff member who will assist in patient recruitment, patient  
795 follow-up and data entry. She will work closely with project personnel to provide needed administrative  
796 support for all study tasks.

797

798 Patient Investigators: (will attend 15 1-hr meetings per year in all years of the study)

799 In order to maximize the effectiveness of the intervention, we will have 5 patient investigators join the  
800 research team. All patient investigators/stakeholders will participate in an advisory panel and  
801 participate in all aspects of the study, including 1) refining our online recruitment strategy (in terms of  
802 content or where to place the ads); 2) Monitoring our implementation progress and helping us refine  
803 our approach in case of issues such as slow recruitment; 3) Evaluating the data and helping us present  
804 results to smokers and community-based organization; and 4) helping us prepare for approaches to  
805 disseminate the intervention beyond the scope of the project. These individuals will neither interact  
806 with subjects nor access private identifiable information about them.

807  
808 Under the close supervision of the Principal Investigator and the Project Director, all research study staff  
809 will be appropriately trained and will review the protocol to inform them of their duties and ensure  
810 proper conduction of the research study.

811

### 812 **24. LOCAL RECRUITMENT METHODS**

813 We will recruit 1700 smokers (425-440 smokers per group) for this study. Smokers will be  
814 recruited through online advertisements (see S2S\_Ads) (Facebook and Google) or by peer recruitment.  
815 These smokers will be asked to provide online consent (See S2S\_Consent). We have conducted multiple  
816 online studies and will format our online consent to be easily understandable to the participants. (see  
817 #22 Setting for more information about online recruitment method)

818

### 819 **25. LOCAL NUMBER OF SUBJECTS**

820 Recruitment of all subjects will occur online and will not be restricted to local recruitment.

821

### 822 **26. CONFIDENTIALITY**

823 We have minimized data collection to that which is needed to answer our hypotheses. We have  
824 stringent protection against breach of confidentiality using secured servers and locked office spaces for

## INVESTIGATOR STUDY PLAN - REQUIRED

825 data entry at UMMS. The study PI and research coordinator will do periodic checks to ensure that  
826 participant confidentiality is protected at all stages of data management and analysis. All data collected  
827 will be stored in a HIPAA compliant regulated environment and access will be only through a secure VPN  
828 network. All smokers' related identifiers are encrypted in the database. Our biostatistician will organize  
829 data security and archiving. In no way will individual participant data be released to the public or cited in  
830 a publication. We have substantial experience with implementing these methods successfully. All our  
831 research staffs are trained in HIPAA compliance and will complete all human subjects training. Our grant  
832 funder, PCORI, may also be an entity that can access confidential information within our study.

833 To ensure that the study data is held confidential, consented participants will be assigned a study ID  
834 (identifier). We will not be collecting Social Security numbers, Date of Birth, or other unique identifiers  
835 other than those previously mentioned. All study data will be entered and stored on a secure server that  
836 that is assigned to the Department of Quantitative Health Sciences. Only UMMS IRB and study  
837 investigators will have access to the research data. The IP address of the subjects' computers will also be  
838 retained and kept in a secure location. IP addresses will be linked only to study participant code  
839 numbers. This information, along with all other data on enrolled participants will be destroyed 5 years  
840 after the protocol ends.

841

### 842 **27. PROVISIONS TO PROTECT THE PRIVACY INTERESTS OF SUBJECTS**

843 At the start of the study, all study staff will be trained in practices that ensure participants'  
844 confidentiality and privacy. There may be two situations that could accidentally reveal the participation in  
845 an online study. Our Facebook website plugin will facilitate peer recruitment of smokers to the study.  
846 Through the website plugin, smokers will be able to post private messages. These private messages are  
847 only viewable by the person that the message is sent to. We will emphasize with the recruiter the  
848 importance of using private messages, and the potential risks of posting messages on Facebook through  
849 other means. No identifiers of the person being peer recruited will be collected until the person enrolls  
850 in the study.

851

852

### 853 **28. COMPENSATION FOR RESEARCH-RELATED INJURY**

854 This research does not involve more than minimal risks to participants.

855

### 856 **29. ECONOMIC BURDEN TO SUBJECTS**

857 There is no economic burden to participants.

858

### 859 **30. CONSENT PROCESS**

860 Individuals who are interested will be directed to a website that will explain the study in detail.  
861 Once the individual has agreed to participate they will be presented a webpage with a consent form. If  
862 they click on "yes" they will agree to participate in the study. Contact information for both the PI and  
863 the research coordinator will be available on the consent form.

864

### 865 **31. PROCESS TO DOCUMENT CONSENT IN WRITING**

866 We have requested a waiver of written consent due the minimal risk of the study and involves  
867 no procedures that require written consent outside of the research context.

868

### 869 **32. DRUGS OR DEVICES**

870 NA

871

## INVESTIGATOR STUDY PLAN - REQUIRED

872

### 873 REFERENCES

- 874 1. Houston, T.K. and Ford, D.E., *A tailored Internet-delivered intervention for smoking*  
875 *cessation designed to encourage social support and treatment seeking: usability testing*  
876 *and user tracing. Inform Health Soc Care, 2008. 33(1): p. 5-19. PMID:*
- 877 2. Houston, T.K., Sadasivam, R.S., Ford, D.E., Richman, J., Ray, M.N., and Allison, J.J.,  
878 *The QUIT-PRIMO provider-patient Internet-delivered smoking cessation referral*  
879 *intervention: a cluster-randomized comparative effectiveness trial: study protocol.*  
880 *Implement Sci, 2010. 5: p. 87. PMID:*
- 881 3. Houston, T.K., Sadasivam, R.S., Allison, J.J., Ash, A.S., Ray, M.N., English, T.M., Hogan,  
882 T.P., and Ford, D.E., *Evaluating the QUIT-PRIMO clinical practice ePortal to increase*  
883 *smoker engagement with online cessation interventions: a national hybrid type 2*  
884 *implementation study. Implement Sci, 2015. 10: p. 154. PMID:*
- 885 4. Centers for Disease Control and Prevention. *African Americans and Tobacco Use.*  
886 *2014; Available from: <http://www.cdc.gov/tobacco/disparities/african->*  
887 *[americans/index.htm](http://www.cdc.gov/tobacco/disparities/african-americans/index.htm).*
- 888 5. Kulak, J.A., Cornelius, M.E., Fong, G.T., and Giovino, G.A., *Differences in Quit Attempts*  
889 *and Cigarette Smoking Abstinence Between Whites and African Americans in the United*  
890 *States: Literature Review and Results From the International Tobacco Control US*  
891 *Survey. Nicotine Tob Res, 2016. 18 Suppl 1: p. S79-87. PMID:*
- 892 6. Nollen, N.L., Cox, L.S., Yu, Q., Ellerbeck, E.F., Scheuermann, T.S., Benowitz, N.L.,  
893 Tyndale, R.F., Mayo, M.S., and Ahluwalia, J.S., *A clinical trial to examine disparities in*  
894 *quitting between African-American and White adult smokers: Design, accrual, and*  
895 *baseline characteristics. Contemp Clin Trials, 2016. 47: p. 12-21. PMID:*
- 896 7. Webb, M.S., Francis, J., Hines, B.C., and Quarles, F.B., *Health disparities and culturally*  
897 *specific treatment: perspectives and expectancies of African American smokers. J Clin*  
898 *Psychol, 2007. 63(6): p. 567-83. PMID:*
- 899 8. Webb, M.S., *Science Brief: Addressing Tobacco-Associated Health Disparities through*  
900 *Behavioral Science, in Psychological Science Agenda, A.P. Association, Editor. 2010*
- 901 9. American Cancer Society. *Cancer Facts & Figures for African Americans.* [cited 2016  
902 Apr]; Available from: [http://www.cancer.org/research/cancerfactsstatistics/cancer-facts-](http://www.cancer.org/research/cancerfactsstatistics/cancer-facts-figures-for-african-americans)  
903 [figures-for-african-americans](http://www.cancer.org/research/cancerfactsstatistics/cancer-facts-figures-for-african-americans).
- 904 10. U.S. Department of Health and Human Services, *Tobacco use among U.S. racial/ethnic*  
905 *minority groups — African Americans, American Indians and Alaska Natives, Asian*  
906 *Americans and Pacific Islanders, and Hispanics: A report of the surgeon general. , U.S.*  
907 *Department of Health and Human Services, Centers for Disease Control and Prevention,*  
908 *National Center for Chronic Disease Prevention and Health Promotion, Office on*  
909 *Smoking and Health.: Atlanta, Georgia*
- 910 11. Murray, C.J. and Lopez, A.D., *Alternative projections of mortality and disability by cause*  
911 *1990-2020: global burden of disease study. The Lancet, 1997. 349: p. 1498-1504. PMID:*
- 912 12. Critchley, J.A. and Capewell, S., *Mortality risk reduction associated with smoking*  
913 *cessation in patients with coronary heart disease: a systematic review. Jama, 2003.*  
914 *290(1): p. 86-97. PMID:*
- 915 13. Fiore, M.C., Croyle, R.T., Curry, S.J., Cutler, C.M., Davis, R.M., Gordon, C., Healton,  
916 C., Koh, H.K., Orleans, C.T., Richling, D., Satcher, D., Seffrin, J., Williams, C., Williams,  
917 L.N., Keller, P.A., and Baker, T.B., *Preventing 3 million premature deaths and helping 5*

## INVESTIGATOR STUDY PLAN - REQUIRED

- 918 million smokers quit: a national action plan for tobacco cessation. *Am J Public Health*,  
919 2004. 94(2): p. 205-10. PMID:
- 920 14. Trosclair, A., Husten, C., Pederson, L., and Dhillon, I., Cigarette smoking among adults  
921 – United States, 2000. *Morbidity and Mortality Weekly Report*, 2002. 51(29): p. 642-645.  
922 PMID:
- 923 15. Fiore, C., Jaen, C.R., and Baker, T.B., *Treating Tobacco Use And Dependence: 2008*  
924 *update*. 2008, U.S. Department of Health and Human Services. Public Health Service:  
925 Rockville, MD
- 926 16. Centers for Disease Control and Prevention, O.o.S.a.H. *Smoking & Tobacco Use*. 2015  
927 April 15, 2015 [cited 2015 April 27]; Available from:  
928 [http://www.cdc.gov/tobacco/data\\_statistics/fact\\_sheets/fast\\_facts/](http://www.cdc.gov/tobacco/data_statistics/fact_sheets/fast_facts/).
- 929 17. Ekpu, V.U. and Brown, A.K., *The Economic Impact of Smoking and of Reducing Smoking*  
930 *Prevalence: Review of Evidence*. *Tob Use Insights*, 2015. 8: p. 1-35. PMID:
- 931 18. NIH State-of-the-Science Conference Statement on Tobacco Use: Prevention, Cessation,  
932 and Control. *NIH Consens State Sci Statements*, 2006. 23(3): p. 1-26. PMID:
- 933 19. Shahab, L. and McEwen, A., *Online support for smoking cessation: a systematic review*  
934 *of the literature*. *Addiction*, 2009. 104(11): p. 1792-804. PMID:
- 935 20. Myung, S.K., McDonnell, D.D., Kazinets, G., Seo, H.G., and Moskowitz, J.M., *Effects of*  
936 *Web- and computer-based smoking cessation programs: meta-analysis of randomized*  
937 *controlled trials*. *Arch Intern Med*, 2009. 169(10): p. 929-37. PMID:
- 938 21. Civiljak, M., Sheikh, A., Stead, L.F., and Car, J., *Internet-based interventions for smoking*  
939 *cessation*. *Cochrane Database Syst Rev*, 2010(9): p. CD007078. PMID:
- 940 22. Lancaster, T. and Stead, L.F., *Self-help interventions for smoking cessation*. *Cochrane*  
941 *Database Syst Rev*, 2005(3): p. CD001118. PMID:
- 942 23. Sciamanna, C.N., Ford, D.E., Flynn, J.A., and Langford, C., *An evidence-based*  
943 *interactive computer program to assist physicians in counseling smokers to quit*. *MD*  
944 *Computing*, 1999. 16(5): p. 54-60. PMID:
- 945 24. Strecher, V.J., *Computer-tailored smoking cessation materials: a review and discussion*.  
946 *Patient Education and Counseling*, 1999. 36: p. 107-117. PMID:
- 947 25. Bental, D.S., Cawsey, A., and Jones, R., *Patient information systems that tailor to the*  
948 *individual*. *Patient Education and Counseling*, 1999. 36: p. 171-180. PMID:
- 949 26. Ramelson, H.Z., Friedman, R.H., and Ockene, J.K., *An automated telephone-based*  
950 *smoking cessation education and counseling system*. *Patient Education and Counseling*,  
951 1999. 36: p. 131-144. PMID:
- 952 27. Lubalin, J., *Consumer Health Informatics and Patient Decision-Making*. 1997, Rockville  
953 MD: U.S. Department of Health and Human Services, U.S. Government Printing Office.
- 954 28. Ossip-Klein, D.J. and McIntosh, S., *Quitlines in North America: evidence base and*  
955 *applications*. *Am J Med Sci*, 2003. 326(4): p. 201-5. PMID:
- 956 29. HHS 'Quitline' helps Americans stop smoking. *FDA Consum*, 2005. 39(1): p. 4-5. PMID:
- 957 30. Sadasivam, R.S., Allison, J.J., Ray, M.N., Ford, D.E., and Houston, T.K., *Using a*  
958 *Resource Effect Study Pre-Pilot to Inform a Large Randomized Trial: The*  
959 *Decide2Quit.Org Web-Assisted Tobacco Intervention* (in press: AMIA-0373-A2012.R1).  
960 *AMIA Annu Symp Proc*, 2012. PMID:
- 961 31. *PCORI Communication and Dissemination Research - Cycle 1*. 2016 [cited 2016 May];  
962 Available from: <http://www.pcori.org/sites/default/files/PCORI-PFA-2016-Cycle-1-Communication-and-Dissemination-Research.pdf>.  
963

## INVESTIGATOR STUDY PLAN - REQUIRED

- 964 32. McCormack L, Sheridan S, Lewis M, Boudewyns V, Melvin CL, Kistler C, Lux LJ, Cullen  
965 K, and Lohr KN, *Communication and Dissemination Strategies To Facilitate the Use of*  
966 *Health-Related Evidence*, in *Evidence Report/Technology Assessment, R.I.U.o.N.C.E.-*  
967 *b.P.C.u.C.N. 290-2007-10056-I*, Editor. November 2013, Rockville, MD: Agency for  
968 *Healthcare Research and Quality*; No. 13(14)-E003-EF
- 969 33. Brownson, R.C., Colditz, G.A., and Proctor, E.K., *Dissemination and implementation*  
970 *research in health : translating science to practice*. 2012, Oxford ; New York: Oxford  
971 *University Press*. xxiii, 536 p.
- 972 34. Graham, A.L., Cobb, N.K., Papandonatos, G.D., Moreno, J.L., Kang, H., Tinkelman,  
973 D.G., Bock, B.C., Niaura, R.S., and Abrams, D.B., *A randomized trial of Internet and*  
974 *telephone treatment for smoking cessation*. *Arch Intern Med*, 2011. 171(1): p. 46-53.  
975 PMID:
- 976 35. Hughes, J.R. and Carpenter, M.J., *The feasibility of smoking reduction: an update*.  
977 *Addiction (Abingdon, England)*, 2005. 100(8): p. 1074-1089. PMID:
- 978 36. Smit, E.S., Hoving, C., Schelleman-Offermans, K., West, R., and de Vries, H., *Predictors*  
979 *of successful and unsuccessful quit attempts among smokers motivated to quit*. *Addict*  
980 *Behav*, 2014. 39(9): p. 1318-24. PMID:
- 981 37. Glasgow, R.E., Klesges, L.M., Dzewaltowski, D.A., Estabrooks, P.A., and Vogt, T.M.,  
982 *Evaluating the impact of health promotion programs: using the RE-AIM framework to*  
983 *form summary measures for decision making involving complex issues*. *Health Educ Res*,  
984 2006. 21(5): p. 688-94. PMID:
- 985 38. *Centers for Disease Control and Prevention (2011) Quitting Smoking Among Adults ---*  
986 *United States, 2001--2010. Morbidity and Mortality Weekly Report (MMWR) 60, 1513-*  
987 *1519*.
- 988 39. *Pew Research Center. Broadband vs. Dial-up Adoption Over Time*. 2014 [cited 2015  
989 October 10]; Available from: [http://www.pewinternet.org/data-trend/internet-](http://www.pewinternet.org/data-trend/internet-use/connection-type/)  
990 [use/connection-type/](http://www.pewinternet.org/data-trend/internet-use/connection-type/).
- 991 40. *Pew Research Center. Internet Use Over Time*. 2014 [cited 2015 October 10];  
992 Available from: [http://www.pewinternet.org/data-trend/internet-use/internet-use-over-](http://www.pewinternet.org/data-trend/internet-use/internet-use-over-time/)  
993 [time/](http://www.pewinternet.org/data-trend/internet-use/internet-use-over-time/).
- 994 41. *Pew Research Center's Internet and American Life Project. Chapter Two: Usage and*  
995 *Attitudes Toward Smartphones*. 2015 [cited May 2016]; Available from:  
996 [http://www.pewinternet.org/2015/04/01/chapter-two-usage-and-attitudes-toward-](http://www.pewinternet.org/2015/04/01/chapter-two-usage-and-attitudes-toward-smartphones/)  
997 [smartphones/](http://www.pewinternet.org/2015/04/01/chapter-two-usage-and-attitudes-toward-smartphones/).
- 998 42. *Pew Research Center's Internet and American Life Project. Social Media Fact Sheet*.  
999 2014 [cited May 2016]; Available from: [http://www.pewinternet.org/fact-sheets/social-](http://www.pewinternet.org/fact-sheets/social-networking-fact-sheet/)  
1000 [networking-fact-sheet/](http://www.pewinternet.org/fact-sheets/social-networking-fact-sheet/).
- 1001 43. Huang, G.C., Unger, J.B., Soto, D., Fujimoto, K., Pentz, M.A., Jordan-Marsh, M., and  
1002 Valente, T.W., *Peer influences: The impact of online and offline friendship networks on*  
1003 *adolescent smoking and alcohol use*. *Journal of Adolescent Health*, 2013. PMID:
- 1004 44. Christakis, N.A. and Fowler, J.H., *The collective dynamics of smoking in a large social*  
1005 *network*. *New England journal of medicine*, 2008. 358(21): p. 2249-2258. PMID:
- 1006 45. Swider, S.M., *Outcome effectiveness of community health workers: an integrative*  
1007 *literature review*. *Public Health Nurs*, 2002. 19(1): p. 11-20. PMID:

## INVESTIGATOR STUDY PLAN - REQUIRED

- 1008 46. Eng, E., Parker, E., and Harlan, C., *Lay health advisor intervention strategies: a*  
1009 *continuum from natural helping to paraprofessional helping. Health Educ Behav, 1997.*  
1010 *24(4): p. 413-7. PMID:*
- 1011 47. Carroll, B., *The hidden power of your customers : four keys to growing your business*  
1012 *through existing customers. 2011, Hoboken, N.J.: Wiley. xvi, 240 p.*
- 1013 48. Marlin, B.M., Adams, R.J., Sadasivam, R., and Houston, T.K., *Towards collaborative*  
1014 *filtering recommender systems for tailored health communications. AMIA Annu Symp*  
1015 *Proc, 2013. 2013: p. 1600-7. PMID:*
- 1016 49. Sadasivam, R.S., Cutrona, S.L., Volz, E., Rao, S.R., and Houston, T.K., *Web-based peer-*  
1017 *driven chain referrals for smoking cessation. Stud Health Technol Inform, 2013. 192: p.*  
1018 *357-61. PMID:*
- 1019 50. Wuyts, S., *The connected customer : the changing nature of consumer and business*  
1020 *markets. 2010, New York: Routledge. xviii, 353 p.*
- 1021 51. Sadasivam, R.S., Volz, E.M., Kinney, R.L., Rao, S.R., and Houston, T.K., *Share2Quit:*  
1022 *Web-Based Peer-Driven Referrals for Smoking Cessation. JMIR Res Protoc, 2013. 2(2):*  
1023 *p. e37. PMID:*
- 1024 52. Sadasivam, R.S., Kinney, R.L., Delaughter, K., Rao, S.R., Williams, J.H., Coley, H.L.,  
1025 Ray, M.N., Gilbert, G.H., Allison, J.J., Ford, D.E., and Houston, T.K., *Who participates*  
1026 *in Web-assisted tobacco interventions? The QUIT-PRIMO and National Dental Practice-*  
1027 *Based Research Network Hi-Quit studies. J Med Internet Res, 2013. 15(5): p. e77.*  
1028 *PMID:*
- 1029 53. Kreuter, M., *Tailoring health messages : customizing communication with computer*  
1030 *technology. LEA's communication series. 2000, Mahwah, N.J.: L. Erlbaum. xiii, 270 p.*
- 1031 54. DiClemente, C.C., Prochaska, J.O., Fairhurst, S.K., Velicer, W.F., Velasquez, M.M., and  
1032 Rossi, J.S., *The process of smoking cessation: an analysis of precontemplation,*  
1033 *contemplation, and preparation stages of change. J Consult Clin Psychol, 1991. 59(2): p.*  
1034 *295-304. PMID:*
- 1035 55. Bartholomew, L.K., *Planning health promotion programs : an intervention mapping*  
1036 *approach. 3rd ed. 2011, San Francisco, CA: Jossey-Bass. xx, 745 p.*
- 1037 56. Bandura, A., *Social Foundations of Thought and Action: a social cognitive theory. 1986,*  
1038 *Englewood Cliffs, NJ: Prentice Hall.*
- 1039 57. Shiffman, S., Paty, J.A., Rohay, J.M., Di Marino, M.E., and Gitchell, J., *The efficacy of*  
1040 *computer-tailored smoking cessation material as a supplement to nicotine polacrilex gum*  
1041 *therapy. Arch Intern Med, 2000. 160(11): p. 1675-81. PMID:*
- 1042 58. Strecher, V.J., *Computer-tailored smoking cessation materials: a review and discussion.*  
1043 *Patient Educ Couns, 1999. 36(2): p. 107-17. PMID:*
- 1044 59. Brug, J., Steenhuis, I., van Assema, P., and de Vries, H., *The impact of a computer-*  
1045 *tailored nutrition intervention. Prev Med, 1996. 25(3): p. 236-42. PMID:*
- 1046 60. Kreuter, M.W. and Strecher, V.J., *Do tailored behavior change messages enhance the*  
1047 *effectiveness of health risk appraisal? Results from a randomized trial. Health Educ Res,*  
1048 *1996. 11(1): p. 97-105. PMID:*
- 1049 61. Kreuter, M.W., *Community health promotion ideas that work : a field-book for*  
1050 *practitioners. Jones and Bartlett series in health. 1998, Sudbury, Mass.: Jones and*  
1051 *Bartlett Publishers. xviii, 206 p.*
- 1052 62. Segaran, T., *Programming collective intelligence : building smart web 2.0 applications.*  
1053 *1st ed. 2007, Beijing ; Sebastapol CA: O'Reilly. xxi, 334 p.*

## INVESTIGATOR STUDY PLAN - REQUIRED

- 1054 63. Tom Vanderbilt. *The Science Behind the Netflix Algorithms That Decide What You'll*  
1055 *Watch Next*. 2013 [cited 2014 August]; Available from:  
1056 [http://www.wired.com/2013/08/qq\\_netflix-algorithm/](http://www.wired.com/2013/08/qq_netflix-algorithm/).
- 1057 64. Joseph A. Konstan and Riedl, J. *Deconstructing Recommender Systems: How Amazon*  
1058 *and Netflix predict your preferences and prod you to purchase*. 2012 24 Sep [cited 2014  
1059 August]; Available from: [http://spectrum.ieee.org/computing/software/deconstructing-](http://spectrum.ieee.org/computing/software/deconstructing-recommender-systems)  
1060 [recommender-systems](http://spectrum.ieee.org/computing/software/deconstructing-recommender-systems).
- 1061 65. Sadasivam, R.S., Cutrona, S.L., Kinney, R.L., Marlin, B.M., Mazor, K.M., Lemon, S.C.,  
1062 *and Houston, T.K., Collective-Intelligence Recommender Systems: Advancing Computer*  
1063 *Tailoring for Health Behavior Change Into the 21st Century*. *J Med Internet Res*, 2016.  
1064 18(3): p. e42. PMID:
- 1065 66. Ryan, R.M. and Deci, E.L., *Self-determination theory and the facilitation of intrinsic*  
1066 *motivation, social development, and well-being*. *The American psychologist*, 2000. 55(1):  
1067 p. 68-78. PMID:
- 1068 67. Deci, E.L. and Ryan, R.M., *The "what" and "why" of goal pursuits: Human needs and the*  
1069 *self-determination of behavior*. *Psychological Inquiry*, 2000. 11: p. 227-268. PMID:
- 1070 68. Vallerand, R.J., *Deci and Ryan's self-determination theory: A view from the hierarchical*  
1071 *model of intrinsic and extrinsic motivation* *Psychological Inquiry*, 2000. 11(4): p. 312-  
1072 318. PMID:
- 1073 69. Flynn, B.S., Worden, J.K., Bunn, J.Y., Connolly, S.W., and Dorwaldt, A.L., *Evaluation of*  
1074 *smoking prevention television messages based on the elaboration likelihood model*.  
1075 *Health Educ Res*, 2011. PMID:
- 1076 70. Grant, A., Berlin, A., and Freeman, G.K., *The impact of a student learning journal: a*  
1077 *two-stage evaluation using the Nominal Group Technique*. *Med Teach*, 2003. 25(6): p.  
1078 659-61. PMID:
- 1079 71. Miller, D., Shewchuk, R., Elliot, T.R., and Richards, S., *Nominal group technique: a*  
1080 *process for identifying diabetes self-care issues among patients and caregivers*. *Diabetes*  
1081 *Educ*, 2000. 26(2): p. 305-10, 312, 314. PMID:
- 1082 72. Sadasivam, R.S., Delaughter, K., Crenshaw, K., Sobko, H.J., Williams, J.H., Coley, H.L.,  
1083 Ray, M.N., Ford, D.E., Allison, J.J., and Houston, T.K., *Development of an interactive,*  
1084 *Web-delivered system to increase provider-patient engagement in smoking cessation*. *J*  
1085 *Med Internet Res*, 2011. 13(4): p. e87. PMID:
- 1086 73. Coley, H.L., Sadasivam, R.S., Williams, J.H., Volkman, J.E., Schoenberger, Y.M., Kohler,  
1087 C.L., Sobko, H., Ray, M.N., Allison, J.J., Ford, D.E., Gilbert, G.H., Houston, T.K.,  
1088 National Dental, P., and Group, Q.C., *Crowdsourced peer- versus expert-written*  
1089 *smoking-cessation messages*. *Am J Prev Med*, 2013. 45(5): p. 543-50. PMID:
- 1090 74. Fiore, M., Jaen, C., Baker, T., Bailey, W., Benowitz, N., Curry, S., Dorfman, S.,  
1091 Froelicher, E., Goldstein, M., Healton, C., Henderson, P., Heyman, R., Koh, H., Kottke,  
1092 T., Lando, H., Mecklenburg, R., Mermelstein, R., Mullen, P., Orleans, C., Robinson, L.,  
1093 Stitzer, M., Tommasello, A., Villejo, L., and Wewers, M., *Treating Tobacco Use and*  
1094 *Dependence: 2008 Update*. *Clinical Practice Guideline*. May2008, Rockville, MD: U.S.  
1095 Department of Health and Human Services. Public Health Service.
- 1096 75. Bandura, A., *Social Foundations of Thought and Action: a social cognitive theory*. 1986,  
1097 Englewood Cliffs, NJ: Prentice Hall.



## INVESTIGATOR STUDY PLAN - REQUIRED

- 1098 76. *Melville, P., Mooney, R.J., and Nagarajan, R., Content-Boosted Collaborative Filtering*  
1099 *for Improved Recommendations, in Proceedings of the Eighteenth National Conference*  
1100 *on Artificial Intelligence (AAAI-02). 2002: Edmonton, Alberta. p. 187-192*
- 1101 77. *Adams, R.J., Sadasivam, R.S., Balakrishnan, K., Kinney, R.L., Houston, T.K., and Marlin,*  
1102 *B.M., PERSPeCT: collaborative filtering for tailored health communications, in*  
1103 *RecSys'14. 2014: Foster City, Silicon Valley, CA. p. 329-332.10.1145/2645710.2645768*
- 1104 78. *Sadasivam, R.S., Allison, J.J., Ray, M.N., Ford, D.E., and Houston, T.K., Using a*  
1105 *resource effect study pre-pilot to inform a large randomized trial: the Decide2Quit.Org*  
1106 *Web-assisted tobacco intervention. AMIA Annu Symp Proc, 2012. 2012: p. 789-98.*  
1107 *PMID:*
- 1108 79. *Houston, T.K., Sands, D.Z., Jenckes, M.W., and Ford, D.E., Experiences of patients who*  
1109 *were early adopters of electronic communication with their physician: satisfaction,*  
1110 *benefits, and concerns. Am J Manag Care, 2004. 10(9): p. 601-8. PMID:*
- 1111 80. *Sciamanna, C.N., Novak, S.P., Houston, T.K., Gramling, R., and Marcus, B.H., Visit*  
1112 *satisfaction and tailored health behavior communications in primary care. Am J Prev*  
1113 *Med, 2004. 26(5): p. 426-30. PMID:*
- 1114 81. *Centers for Disease Control and Prevention (CDC). 2010 Behavioral Risk Factor*  
1115 *Surveillance System Survey Questionnaire. Available from:*  
1116 *<http://www.cdc.gov/brfss/pubs/index.htm#users>. Archived at*  
1117 *<http://www.webcitation.org/6BGROyW6b>.*
- 1118 82. *Jarvis MJ, T.-P.H., Feyerabend C, Vesey C, Saloojee Y, Comparison of tests used to*  
1119 *distinguish smokers from non-smokers. American Journal of Public Health, 1987.*  
1120 *77(11): p. 1435-38. PMID:*
- 1121 83. *Gaalema, D.E., Higgins, S.T., Bradstreet, M.P., Heil, S.H., and Bernstein, I.M., Using*  
1122 *NicAlert strips to verify smoking status among pregnant cigarette smokers. Drug Alcohol*  
1123 *Depend, 2011. 119(1-2): p. 130-3. PMID:*
- 1124 84. *Marrone, G.F., Paulpillai, M., Evans, R.J., Singleton, E.G., and Heishman, S.J., Breath*  
1125 *carbon monoxide and semiquantitative saliva cotinine as biomarkers for smoking. Hum*  
1126 *Psychopharmacol, 2010. 25(1): p. 80-3. PMID:*
- 1127 85. *Raja, M., Garg, A., Yadav, P., Jha, K., and Handa, S., Diagnostic Methods for Detection*  
1128 *of Cotinine Level in Tobacco Users: A Review. J Clin Diagn Res, 2016. 10(3): p. ZE04-6.*  
1129 *PMID:*
- 1130 86. *Rabe-Hesketh, S., Skrondal, A., and Pickles, A., Reliable estimation of generalized linear*  
1131 *mixed models using adaptive quadrature. Stata Journal, 2002. 2(1): p. 1-21. PMID:*
- 1132 87. *Velicer, W.F., Prochaska, J.O., Rossi, J.S., and Snow, M.G., Assessing outcome in*  
1133 *smoking cessation studies. Psychol Bull, 1992. 111(1): p. 23-41. PMID:*
- 1134 88. *Cooke, F., Bullen, C., Whittaker, R., McRobbie, H., Chen, M.H., and Walker, N.,*  
1135 *Diagnostic accuracy of NicAlert cotinine test strips in saliva for verifying smoking status.*  
1136 *Nicotine Tob Res, 2008. 10(4): p. 607-12. PMID:*
- 1137 89. *Hintze, J., NCSS and PASS. Number Cruncher Statistical Systems, NCSS, LLC.:  
1138 Kaysville, UT.*
- 1139 90. *Whitehead, J., Sample size calculations for ordered categorical data. Stat Med, 1993.*  
1140 *12(24): p. 2257-71. PMID:*
- 1141 91. *Carpenter, M.J., Hughes, J.R., Gray, K.M., Wahlquist, A.E., Saladin, M.E., and Alberg,*  
1142 *A.J., Nicotine therapy sampling to induce quit attempts among smokers unmotivated to*  
1143 *quit: a randomized clinical trial. Arch Intern Med, 2011. 171(21): p. 1901-7. PMID:*

## INVESTIGATOR STUDY PLAN - REQUIRED

- 1144 92. Austin, P.C., Manca, A., Zwarenstein, M., Juurlink, D.N., and Stanbrook, M.B., A  
1145 substantial and confusing variation exists in handling of baseline covariates in  
1146 randomized controlled trials: a review of trials published in leading medical journals. *J*  
1147 *Clin Epidemiol*, 2010. 63(2): p. 142-53. PMID:
- 1148 93. Senn, S., Testing for baseline balance in clinical trials. *Stat Med*, 1994. 13(17): p. 1715-  
1149 26. PMID:
- 1150 94. Ray, M.N., Allison, J.J., Coley, H.L., Williams, J.H., Kohler, C., Gilbert, G.H., Richman,  
1151 J.S., Kiefe, C.I., Sadasivam, R.S., Houston, T.K., and National, D.C.G., Variations in  
1152 tobacco control in National Dental PBRN practices: the role of patient and practice  
1153 factors. *Spec Care Dentist*, 2013. 33(6): p. 286-93. PMID:
- 1154 95. Sadasivam, R.S., Hogan, T.P., Volkman, J.E., Smith, B.M., Coley, H.L., Williams, J.H.,  
1155 Delaughter, K., Ray, M.N., Gilbert, G.H., Ford, D.E., Allison, J.J., Houston, T.K.,  
1156 National Dental, P., and Groups, Q.C., Implementing point of care "e-referrals" in 137  
1157 clinics to increase access to a quit smoking internet system: the Quit-Primo and National  
1158 Dental PBRN HI-QUIT Studies. *Transl Behav Med*, 2013. 3(4): p. 370-8. PMID:
- 1159 96. Rocheleau, M., Sadasivam, R.S., Baquis, K., Stahl, H., Kinney, R.L., Pagoto, S.L., and  
1160 Houston, T.K., An observational study of social and emotional support in smoking  
1161 cessation Twitter accounts: content analysis of tweets. *J Med Internet Res*, 2015. 17(1):  
1162 p. e18. PMID:
- 1163 97. Chen, P.W. When Patients Share Their Stories, Health May Improve. 2011 11/13/2013];  
1164 Available from:  
1165 [http://www.nytimes.com/2011/02/10/health/views/10chen.html?\\_r=3&ref=health&](http://www.nytimes.com/2011/02/10/health/views/10chen.html?_r=3&ref=health&).
- 1166 98. Weintraub, K. Talk therapy: Storytelling may help what ails her - just as her story has  
1167 helped others. 2011 11/13/2013]; Available from:  
1168 [http://www.boston.com/lifestyle/health/articles/2011/03/21/patients\\_benefit\\_from\\_listeni](http://www.boston.com/lifestyle/health/articles/2011/03/21/patients_benefit_from_listening_to_the_stories_of_those_dealing_with_similar_ailments/)  
1169 [ng\\_to\\_the\\_stories\\_of\\_those\\_dealing\\_with\\_similar\\_ailments/](http://www.boston.com/lifestyle/health/articles/2011/03/21/patients_benefit_from_listening_to_the_stories_of_those_dealing_with_similar_ailments/).
- 1170 99. Park, A. Storytelling May Help Lower Blood Pressure. 2011 11/13/2013]; Available  
1171 from: [http://healthland.time.com/2011/01/17/story-telling-may-help-to-lower-blood-](http://healthland.time.com/2011/01/17/story-telling-may-help-to-lower-blood-pressure/)  
1172 [pressure/](http://healthland.time.com/2011/01/17/story-telling-may-help-to-lower-blood-pressure/).
- 1173 100. Gopinath, B., Baur, L.A., Hardy, L.L., Kifley, A., Rose, K.A., Wong, T.Y., and Mitchell,  
1174 P., Relationship between a range of sedentary behaviours and blood pressure during  
1175 early adolescence. *J Hum Hypertens*, 2012. 26(6): p. 350-6. PMID:  
1176  
1177
