# Supplementary material for: Effect of a Machine Learning Recommender System and Viral Peer Marketing Intervention on Smoking Cessation: A Randomized Clinical Trial
Source: PubMed Central journal article supplement (PMC9856644; doi:10.1001/jamanetworkopen.2022.50665), 2023-01-12
Supplement: jamanetwopen-e2250665-s002.pdf [file jamanetwopen-e2250665-s002.pdf]

## Supplemental Online Content

Faro JM, Chen J, Flahive J, et al. Effect of a machine learning recommender system and viral peer marketing intervention on smoking cessation: a randomized clinical trial. *JAMA Netw Open*. 2023;6(1):e2250665. doi:10.1001/jamanetworkopen.2022.50665

**eTable 1.** Comparison of Baseline Characteristics Between Individuals With and Without Viral Tool Kit

**eTable 2.** Comparison of Baseline Characteristics Between Individuals Randomized to ML Recommender and Standard Messaging

**eTable 3.** Smoking-Cessation Rates at 6 Months for Each 3 Hypotheses With Missing Outcomes Treated as Smoking

**eTable 4.** Smoking-Cessation Rates at 6 mo for 3 Hypotheses With Missing Outcomes Treated Using Multiple Imputation

This supplemental material has been provided by the authors to give readers additional information about their work.

**eTable 1.** Comparison of Baseline Characteristics Between Individuals With and Without Viral Tool Kit

| Variable                                              | ViralToolkit<br>(n=745)<br>n (%) | NoViralToolkit<br>(n=742)<br>n (%) | P value            |
|-------------------------------------------------------|----------------------------------|------------------------------------|--------------------|
| Age                                                   |                                  |                                    | 0.12               |
| 19-34 years                                           | 236 (31.7%)                      | 208 (28.0%)                        |                    |
| 35-54 years                                           | 259 (34.8%)                      | 249 (33.6%)                        |                    |
| 55+ years                                             | 250 (33.6%)                      | 285 (38.4%)                        |                    |
| Gender                                                |                                  |                                    | 0.007*             |
| Female                                                | 529 (71.0%)                      | 572 (77.1%)                        |                    |
| Male                                                  | 216 (29.0%)                      | 170 (22.9%)                        |                    |
| Race                                                  |                                  |                                    | 0.98               |
| African-American/Black                                | 95 (13.3%)                       | 93 (13.1%)                         |                    |
| White                                                 | 583 (81.9%)                      | 584 (82.3%)                        |                    |
| Other <sup>a</sup>                                    | 34 (4.8%)                        | 33 (4.6%)                          |                    |
| Ethnicity                                             |                                  |                                    | 0.40               |
| Not Hispanic or Latino                                | 652 (93.0%)                      | 639 (91.8%)                        |                    |
| Hispanic or Latino                                    | 49 (7.0%)                        | 57 (8.2%)                          |                    |
| Education                                             |                                  |                                    | 0.018 <sup>b</sup> |
| High school or less education                         | 168 (34.2%)                      | 131 (26.4%)                        |                    |
| Some college or technical school                      | 206 (42.0%)                      | 220 (44.4%)                        |                    |
| College graduate                                      | 117 (23.8%)                      | 145 (29.2%)                        |                    |
| How hard it is for you/family to pay for medical care |                                  |                                    | 0.43               |
| Very hard or hard                                     | 172 (36.0%)                      | 158 (32.5%)                        |                    |
| Somewhat hard                                         | 165 (34.5%)                      | 185 (38.1%)                        |                    |
| Not very hard                                         | 141 (29.5%)                      | 143 (29.4%)                        |                    |
| Readiness to Quit Smoking                             |                                  |                                    | 0.46               |
| I am not thinking about quitting                      | 34 (4.6)                         | 28 (3.8)                           |                    |
| I am thinking of quitting or I have set a quit date   | 597 (81)                         | 585 (79)                           |                    |
| I quit today or I have already quit                   | 109 (15)                         | 123 (17)                           |                    |
| Number of Cigarettes Smoked per Day                   |                                  |                                    | 0.06               |
| 0-5                                                   | 108 (14.5%)                      | 87 (11.7%)                         |                    |
| 6-20                                                  | 499 (67.1%)                      | 486 (65.5%)                        |                    |
| 21 or more                                            | 137 (18.4%)                      | 169 (22.8%)                        |                    |

MLRecommender=Machine learning recommender computer-tailored motivational texting intervention; Stdmessaging= standard motivational texting intervention; ViralToolkit=Peer recruitment toolkit

<sup>a</sup>Includes Asian, American Indian or Alaska Native, Native Hawaiian or Other Pacific Islander

<sup>b</sup>Indicates statistically significant (P<0.05)

**eTable 2.** Comparison of Baseline Characteristics Between Individuals Randomized to ML Recommender and Standard Messaging

| Variable                                              | ML Recommender<br>(n=745)<br>n (%) | Std Messaging<br>(n=742)<br>n (%) | P value |
|-------------------------------------------------------|------------------------------------|-----------------------------------|---------|
| Age                                                   |                                    |                                   | 0.27    |
| 19-34 years                                           | 207 (27.9%)                        | 237 (31.8%)                       |         |
| 35-54 years                                           | 261 (35.2%)                        | 247 (33.1%)                       |         |
| 55+ years                                             | 273 (36.8%)                        | 262 (35.1%)                       |         |
| Gender                                                |                                    |                                   | 0.31    |
| Female                                                | 540 (72.9%)                        | 561 (75.2%)                       |         |
| Male                                                  | 201 (27.1%)                        | 185 (24.8%)                       |         |
| Race                                                  |                                    |                                   | 0.15    |
| African-American                                      | 98 (13.8%)                         | 90 (12.7%)                        |         |
| White                                                 | 588 (82.6%)                        | 579 (81.5%)                       |         |
| Other                                                 | 26 (3.7%)                          | 41 (5.8%)                         |         |
| Ethnicity                                             |                                    |                                   | 0.06    |
| Not Hispanic or Latino                                | 659 (93.7%)                        | 632 (91.1%)                       |         |
| Hispanic or Latino                                    | 44 (6.3%)                          | 62 (8.9%)                         |         |
| Education                                             |                                    |                                   | 0.31    |
| High school or less education                         | 142 (28.3%)                        | 157 (32.4%)                       |         |
| Some college or technical school                      | 219 (43.6%)                        | 207 (42.7%)                       |         |
| College graduate                                      | 141 (28.1%)                        | 121 (24.9%)                       |         |
| How hard it is for you/family to pay for medical care |                                    |                                   | 0.12    |
| Very hard or hard                                     | 173 (35.3%)                        | 157 (33.1%)                       |         |
| Somewhat hard                                         | 163 (33.3%)                        | 187 (39.5%)                       |         |
| Not very hard                                         | 154 (31.4%)                        | 130 (27.4%)                       |         |
| Readiness to Quit Smoking                             |                                    |                                   | 0.15    |
| I am not thinking about quitting                      | 27 (3.7%)                          | 35 (4.7%)                         |         |
| I am thinking of quitting or I have set a quit date   | 602 (82.1%)                        | 580 (78.1%)                       |         |
| I quit today or I have already quit                   | 104 (14.2%)                        | 128 (17.2%)                       |         |
| Number of Cigarettes Smoked per Day                   |                                    |                                   | 0.54    |
| 0-5                                                   | 92 (12.4%)                         | 103 (13.8%)                       |         |
| 6-20                                                  | 501 (67.6%)                        | 484 (65.0%)                       |         |
| 21 or more                                            | 148 (20.0%)                        | 158 (21.2%)                       |         |

MLRecommender=Machine learning recommender computer-tailored motivational texting intervention; Stdmessaging= standard motivational texting intervention; ViralToolkit=Peer recruitment toolkit

\* Indicates statistically significant (P<0.05).

**eTable 3.** Smoking-Cessation Rates at 6 Months for Each 3 Hypotheses With Missing Outcomes Treated as Smoking

|                                                 | n/N (%)      | Model unadjusted                     |         | Model adjusted for covariates <sup>a</sup> |         |
|-------------------------------------------------|--------------|--------------------------------------|---------|--------------------------------------------|---------|
|                                                 |              | Odds Ratio (95% Confidence Interval) | P value | Odds Ratio (95% Confidence Interval)       | P value |
| <b>Hypothesis H1</b>                            |              |                                      |         |                                            |         |
| <b>Sub-hypothesis 1: Group A vs. Group B</b>    |              |                                      |         |                                            |         |
| Fully enhanced                                  | 89/371 (24)  | 1.73 (1.20, 2.51)                    | 0.004*  | 1.79 (1.17, 2.72)                          | 0.007*  |
| MLRecommender and NoViralToolkit                | 57/370 (15)  | Reference                            |         | Reference                                  |         |
| <b>Sub-hypothesis 2: Group A vs. Group C</b>    |              |                                      |         |                                            |         |
| Fully enhanced                                  | 89/371 (24)  | 1.03 (0.73, 1.44)                    | 0.88    | 0.96 (0.65, 1.42)                          | 0.83    |
| StdMessaging and ViralToolkit                   | 88/374 (24)  | Reference                            |         | Reference                                  |         |
| <b>Sub-hypothesis 3: Group A vs. Group D</b>    |              |                                      |         |                                            |         |
| Fully enhanced                                  | 89/371 (24)  | 1.41 (0.99, 2.01)                    | 0.06    | 1.19 (0.79, 1.78)                          | 0.40    |
| StdMessaging and NoViralToolkit                 | 68/372 (18)  | Reference                            |         | Reference                                  |         |
| <b>Hypothesis 2</b>                             |              |                                      |         |                                            |         |
| <b>Groups (A and C) vs. Groups (B and D)</b>    |              |                                      |         |                                            |         |
| ViralToolkit                                    | 125/742 (17) | 1.54 (1.19, 1.99)                    | 0.001*  | 1.48 (1.11, 1.98)                          | 0.01*   |
| NoVitalToolkit                                  | 177/745 (24) | Reference                            |         | Reference                                  |         |
| <b>Hypothesis 3</b>                             |              |                                      |         |                                            |         |
| <b>Groups (A and B) versus Groups (C and D)</b> |              |                                      |         |                                            |         |
| MLRecommender (A+B)                             | 146/741 (20) | 0.93 (0.72, 1.20)                    | 0.56    | 0.81 (0.61, 1.08)                          | 0.16    |
| StdMessaging (C+D)                              | 156/746 (21) | Reference                            |         | Reference                                  |         |

MLRecommender=Machine learning recommender computer-tailored motivational texting intervention;

Stdmessaging= standard motivational texting intervention; ViralToolkit=Peer recruitment toolkit

Group A – Fully Enhanced Group – MLRecommender and ViralToolkit

Group B – MLRecommender with NoViralToolkit

Group C – StdMessaging with ViralToolkit

Group D – StdMessaging with NoViralToolkit

<sup>a</sup> Multivariable logistic regression was adjusted for sex and education level.

\*Indicates statistically significant (P<0.05).

**eTable 4.** Smoking-Cessation Rates at 6 mo for 3 Hypotheses With Missing Outcomes Treated Using Multiple Imputation

|                                                   | n/N (%) | Model unadjusted                     |         | Model adjusted for covariates <sup>a</sup> |         |
|---------------------------------------------------|---------|--------------------------------------|---------|--------------------------------------------|---------|
|                                                   |         | Odds Ratio (95% Confidence Interval) | P value | Odds Ratio (95% Confidence Interval)       | P value |
| <b>Hypothesis 1</b>                               |         |                                      |         |                                            |         |
| <b>Sub-hypothesis 1: Group A vs. Group B</b>      |         |                                      |         |                                            |         |
| Fully enhanced                                    |         |                                      |         | 1.77 (1.16, 2.70)                          | 0.01*   |
| MLRecommender and NoViralToolkit                  |         | Reference                            |         | Reference                                  |         |
| <b>Sub-hypothesis 2: Group A vs. Group C</b>      |         |                                      |         |                                            |         |
| Fully enhanced                                    |         |                                      |         | 0.90 (0.58, 1.38)                          | 0.63    |
| StdMessaging and ViralToolkit                     |         | Reference                            |         | Reference                                  |         |
| <b>Fully enhanced vs. Standard (Hypothesis 1)</b> |         |                                      |         |                                            |         |
| Fully enhanced                                    |         |                                      |         | 1.44 (0.95, 2.19)                          | 0.09    |
| StdMessaging and NoViralToolkit                   |         | Reference                            |         | Reference                                  |         |
| <b>Hypothesis 2</b>                               |         |                                      |         |                                            |         |
| <b>Groups (A and C) vs. Groups (B and D)</b>      |         |                                      |         |                                            |         |
| ViralToolkit                                      |         |                                      |         | 1.68 (1.24, 2.28)                          | 0.001*  |
| No ViralToolkit                                   |         | Reference                            |         | Reference                                  |         |
| <b>Hypothesis 3</b>                               |         |                                      |         |                                            |         |
| <b>Groups (A and B) versus Groups (C and D)</b>   |         |                                      |         |                                            |         |
| MLRecommender (A+B)                               |         |                                      |         | 0.86 (0.63, 1.18)                          | 0.35    |
| StdMessaging (C+D)                                |         | Reference                            |         | Reference                                  |         |

Group A – Fully Enhanced Group – MLRecommender and ViralToolkit

Group B – MLRecommender with NoViralToolkit

Group C – StdMessaging with ViralToolkit

Group D – StdMessaging with NoViralToolkit

<sup>a</sup> Multivariable logistic regression was adjusted for age, race, sex, education level, and smoking status and number of cigarettes per day measured at baseline.

\* Indicates statistically significant (P<0.05).
