# Supplementary material for: Effect of a Machine Learning Recommender System and Viral Peer Marketing Intervention on Smoking Cessation: A Randomized Clinical Trial
Source: PubMed Central journal article supplement (PMC9856644; doi:10.1001/jamanetworkopen.2022.50665), 2023-01-12
Supplement: jamanetwopen-e2250665-s003.pdf [file jamanetwopen-e2250665-s003.pdf]

## Data Sharing Statement

Faro JM, Chen J, Flahive J, et al. Effect of a machine learning recommender system and viral peer marketing intervention on smoking cessation: a randomized clinical trial. *JAMA Netw Open*. 2023;6(1):e2250665. doi:10.1001/jamanetworkopen.2022.50665

### Data

**Data available:** Yes

**Data types:** Deidentified participant data

**How to access data:** [Rajani.sadasivam@umassmed.edu](mailto:Rajani.sadasivam@umassmed.edu) **When available:** With publication

### Supporting Documents

**Document types:** None

### Additional Information

**Who can access the data:** Anyone requesting the data.

**Types of analyses:** For any purpose.

**Mechanisms of data availability:** With a signed data access agreement.
